# Supplementary material for: Circulation of low pathogenic avian influenza (LPAI) viruses in wild birds and poultry in the Netherlands, 2006–2016
Source: PubMed Central journal article supplement (PMC6757041; doi:10.1038/s41598-019-50170-8), 2019-09-23

## Supplementary information

### Circulation of low pathogenic avian influenza (LPAI) viruses in wild birds and poultry in the Netherlands, 2006-2016

Saskia A. Bergervoet<sup>1,2</sup>, Sylvia B.E. Pritz-Verschuren<sup>1</sup>, Jose L. Gonzales<sup>3</sup>, Alex Bossers<sup>4</sup>, Marjolein J. Poen<sup>2</sup>, Jayeeta Dutta<sup>5</sup>, Zenab Khan<sup>5</sup>, Divya Kriti<sup>5</sup>, Harm van Bakel<sup>5,6</sup>, Ruth Bouwstra<sup>7</sup>, Ron A.M. Fouchier<sup>2</sup>, Nancy Beerens<sup>1\*</sup>

<sup>1</sup>Department of Virology, Wageningen Bioveterinary Research, Lelystad, The Netherlands

<sup>2</sup>Department of Viroscience, Erasmus MC, Rotterdam, The Netherlands

<sup>3</sup>Department of Epidemiology, Wageningen Bioveterinary Research, Lelystad, The Netherlands

<sup>4</sup>Department of Infection Biology, Wageningen Bioveterinary Research, Lelystad, The Netherlands

<sup>5</sup>Department of Genetics and Genomic Sciences, Icahn School of Medicine at Mount Sinai, New York, USA

<sup>6</sup>Icahn Institute for Genomics and Multiscale Biology, Icahn School of Medicine at Mount Sinai, New York, USA

<sup>7</sup>GD Animal Health Service, Deventer, The Netherlands

\*Corresponding author:

Email: [nancy.beerens@wur.nl](mailto:nancy.beerens@wur.nl)

#### Contents

**Supplementary Table S1.** Genbank accession numbers of wild bird virus sequences.

**Supplementary Table S2.** GISAID accession numbers of poultry virus sequences.

**Supplementary Table S3.** Collection and subtyping of wild bird samples.

**Supplementary Table S4.** Collection and subtyping of poultry samples.

**Supplementary Table S5.** Poultry viruses and their most identical wild bird virus.

**Supplementary Figure S1.** Phylogenetic trees of HA genes.

**Supplementary Figure S2.** Phylogenetic trees of NA genes.

**Supplementary Table S1. Genbank accession numbers of wild bird virus sequences.**

Genbank accession numbers of hemagglutinin (HA) and neuraminidase (NA) gene segment sequences of low pathogenic avian influenza (LPAI) viruses from wild birds detected as part of the national avian influenza (AI) surveillance program in the Netherlands, January 2006-September 2016.

| Isolate name                                             | Collection date | Genbank HA segment ID | Genbank NA segment ID |
|----------------------------------------------------------|-----------------|-----------------------|-----------------------|
| A/Barnacle goose/Netherlands/1/2006 (H1N1)               | 2006-01-09      | KX979589              | KX977747              |
| A/Barnacle goose/Netherlands/1/2010 (H6N8)               | 2010-01-08      | KX977787              | KX979558              |
| A/Barnacle goose/Netherlands/1/2011 (H6N8)               | 2011-01-06      | KX979107              | KX979461              |
| A/Barnacle goose/Netherlands/1/2014 (H6N8)               | 2014-12-15      | KX978284              | KX978681              |
| A/Bean goose/Netherlands/1/2007 (H1N1)                   | 2007-01-15      | KX978559              | KX978842              |
| A/Bean goose/Netherlands/1/2008 (H6N8)                   | 2008-01-22      | KX977816              | KX978984              |
| A/Bean goose/Netherlands/1/2009 (H7N1)                   | 2009-01-21      | KX979368              | KX979548              |
| A/Bean goose/Netherlands/2/2009 (H7N1)                   | 2009-01-21      | KX978247              | KX978908              |
| A/Bewicks swan/Netherlands/2/2007 (H4N6)                 | 2007-12-06      | KX978511              | KX977631              |
| A/Bewicks swan/Netherlands/3/2006 (H1N1)                 | 2006-11-17      | KX978266              | KX977791              |
| A/Bewicks swan/Netherlands/3/2007 (H4N6)                 | 2007-12-06      | KX978846              | KX979193              |
| A/Bewicks swan/Netherlands/4/2006 (H9N2)                 | 2006-11-17      | KX977700              | KX979422              |
| A/Bewicks swan/Netherlands/5/2008 (H5N2)                 | 2008-12-17      | KX979015              | KX978975              |
| A/Bewicks swan/Netherlands/6/2006 (H1N1)                 | 2006-11-22      | KX978574              | KX978892              |
| A/Bewicks swan/Netherlands/7/2008 (H7N1)                 | 2008-12-24      | KX978000              | KX978951              |
| A/Bewicks swan/Netherlands/8/2009 (H6N8)                 | 2008-01-04      | KX977884              | KX978281              |
| A/Brent goose/Netherlands/1/2006 (H1N1)                  | 2006-01-10      | KX979392              | KX979523              |
| A/Dunlin/Netherlands/2/2007 (H3N8)                       | 2007-07-31      | KX978538              | KX979291              |
| A/Dunlin/Netherlands/3/2007 (H3N8)                       | 2007-07-31      | KX979366              | KX978457              |
| A/Eurasian teal/Netherlands/1/2008 (H6N1)                | 2008-09-22      | KX978922              | KX978742              |
| A/Eurasian teal/Netherlands/1/2011 (H3N8)                | 2011-10-15      | KX979458              | KX979211              |
| A/Eurasian teal/Netherlands/3/2008 (H6N1)                | 2008-09-22      | KX978950              | KX979001              |
| A/Eurasian wigeon/Netherlands/1/2006 (H6N2)              | 2007-12-21      | KX979500              | KX978832              |
| A/Eurasian wigeon/Netherlands/1/2008 (H6N1)              | 2008-09-22      | KX978248              | KX978405              |
| A/Eurasian wigeon/Netherlands/1/2009 (H5N2)              | 2009-09-11      | KX979575              | KX977926              |
| A/Eurasian wigeon/Netherlands/1/2010 (H5N2)              | 2010-09-27      | KX977950              | KX978397              |
| A/Eurasian wigeon/Netherlands/2/2007 (H1N1)              | 2007-10-20      | KX978381              | KX977776              |
| A/Eurasian wigeon/Netherlands/2/2008 (H7N4)              | 2008-12-29      | KX978318              | KX977640              |
| A/Eurasian wigeon/Netherlands/6/2007 (H1N1)              | 2007-11-15      | KX979129              | KX977745              |
| A/Gadwall duck/Netherlands/1/2011 (H6N2)                 | 2011-11-04      | KX978389              | KX977644              |
| A/Gadwall duck/Netherlands/2/2006 (H9N2)                 | 2006-01-01*     | KX978145              | KX979196              |
| A/Gadwall duck/Netherlands/3/2006 (H3N8)                 | 2006-09-03      | KX978829              | KX979428              |
| A/Greater white-fronted goose/Netherlands/1/2006 (H6N2)  | 2006-01-14      | KX979150              | KX978480              |
| A/Greater white-fronted goose/Netherlands/1/2007 (H1N1)  | 2007-01-23      | KX977711              | KX977666              |
| A/Greater white-fronted goose/Netherlands/1/2009 (H6N8)  | 2009-01-20      | KX978830              | KX979241              |
| A/Greater white-fronted goose/Netherlands/1/2010 (H6N1)  | 2010-01-20      | KX977696              | KX978928              |
| A/Greater white-fronted goose/Netherlands/1/2011 (H6N8)  | 2011-01-04      | KX977775              | KX978983              |
| A/Greater white-fronted goose/Netherlands/1/2012 (H1N1)  | 2012-11-20      | KX978558              | KX978251              |
| A/Greater white-fronted goose/Netherlands/11/2009 (H6N1) | 2009-12-09      | KX977968              | KX978797              |
| A/Greater white-fronted goose/Netherlands/2/2007 (H6N8)  | 2007-12-12      | KX979168              | KX978521              |
| A/Greater white-fronted goose/Netherlands/2/2008 (H6N8)  | 2008-01-22      | KX979494              | KX978669              |
| A/Greater white-fronted goose/Netherlands/2/2009 (H5N3)  | 2009-12-14      | KX977974              | KX979382              |
| A/Greater white-fronted goose/Netherlands/2/2010 (H5N2)  | 2010-01-29      | KX978688              | KX978932              |
| A/Greater white-fronted goose/Netherlands/2/2011 (H6N2)  | 2011-01-13      | KX977613              | KX978753              |
| A/Greater white-fronted goose/Netherlands/3/2006 (H6N8)  | 2006-01-01*     | KX979190              | KX979264              |

|                                                         |             |          |          |
|---------------------------------------------------------|-------------|----------|----------|
| A/Greater white-fronted goose/Netherlands/3/2007 (H6N5) | 2007-12-18  | KX978034 | KX978798 |
| A/Greater white-fronted goose/Netherlands/3/2011 (H6N2) | 2011-01-11  | KX978988 | KX978364 |
| A/Greater white-fronted goose/Netherlands/4/2006 (H6N8) | 2006-01-01* | KX978498 | KX979449 |
| A/Greater white-fronted goose/Netherlands/4/2008 (H6N8) | 2008-01-22  | KX979397 | KX979084 |
| A/Greater white-fronted goose/Netherlands/4/2009 (H5N2) | 2009-02-21  | KX978287 | KX978719 |
| A/Greater white-fronted goose/Netherlands/4/2010 (H6N8) | 2010-02-04  | KX978377 | KX978184 |
| A/Greater white-fronted goose/Netherlands/4/2011 (H1N1) | 2011-01-17  | KX978591 | KX978181 |
| A/Greater white-fronted goose/Netherlands/5/2008 (H5N2) | 2008-12-30  | KX979073 | KX978387 |
| A/Greater white-fronted goose/Netherlands/5/2010 (H5N3) | 2010-11-13  | KX978851 | KX979439 |
| A/Greater white-fronted goose/Netherlands/6/2008 (H5N2) | 2008-12-30  | KX978329 | KX978609 |
| A/Greater white-fronted goose/Netherlands/6/2009 (H6N8) | 2009-01-04  | KX978349 | KX977708 |
| A/Greater white-fronted goose/Netherlands/6/2010 (H6N2) | 2010-11-23  | KX978734 | KX978786 |
| A/Greater white-fronted goose/Netherlands/6/2011 (H6N8) | 2011-12-14  | KX978828 | KX977722 |
| A/Greater white-fronted goose/Netherlands/8/2009 (H6N2) | 2009-12-30  | KX978319 | KX978626 |
| A/Greater white-fronted goose/Netherlands/9/2009 (H6N2) | 2009-12-30  | KX978339 | KX978180 |
| A/Mallard duck/Netherlands/1/2007 (H10N7)               | 2007-01-01* | KX978192 | KX977605 |
| A/Mallard duck/Netherlands/1/2008 (H5N3)                | 2008-01-30  | KX977798 | KX978667 |
| A/Mallard duck/Netherlands/1/2009 (H10N7)               | 2009-02-04  | KX977889 | KX979271 |
| A/Mallard duck/Netherlands/1/2011 (H7N7)                | 2011-02-23  | KX979524 | KX978358 |
| A/Mallard duck/Netherlands/1/2012 (H10N7)               | 2012-01-14  | KX979240 | KX978542 |
| A/Mallard duck/Netherlands/1/2013 (H7N7)                | 2013-01-26  | KX978524 | KX978579 |
| A/Mallard duck/Netherlands/1/2014 (H10N7)               | 2014-02-17  | KX979229 | KX978673 |
| A/Mallard duck/Netherlands/10/2012 (H6N1)               | 2012-09-05  | KX979411 | KX978507 |
| A/Mallard duck/Netherlands/12/2006 (H5N2)               | 2006-09-16  | KX977669 | KX979415 |
| A/Mallard duck/Netherlands/12/2009 (H11N9)              | 2009-09-02  | KX978958 | KX978900 |
| A/Mallard duck/Netherlands/12/2012 (H6N1)               | 2012-10-18  | KX978330 | KX979308 |
| A/Mallard duck/Netherlands/13/2007 (H6N5)               | 2007-11-01  | KX977641 | KX977833 |
| A/Mallard duck/Netherlands/13/2012 (H3N8)               | 2012-10-01  | KX979517 | KX979121 |
| A/Mallard duck/Netherlands/13/2013 (H7N7)               | 2013-12-10  | KX979399 | KX978080 |
| A/Mallard duck/Netherlands/14/2006 (H8N4)               | 2006-01-01* | KX977927 | KX979046 |
| A/Mallard duck/Netherlands/15/2007 (H6N8)               | 2007-11-09  | KX979354 | KX979328 |
| A/Mallard duck/Netherlands/15/2009 (H6N8)               | 2009-10-02  | KX978489 | KX978378 |
| A/Mallard duck/Netherlands/15/2011 (H6N8)               | 2011-09-14  | KX978593 | KX978920 |
| A/Mallard duck/Netherlands/16/2006 (H10N7)              | 2006-01-14  | KX978236 | KX978605 |
| A/Mallard duck/Netherlands/16/2007 (H6N8)               | 2007-11-15  | KX978196 | KX978905 |
| A/Mallard duck/Netherlands/16/2009 (H1N1)               | 2009-09-30  | KX978081 | KX977672 |
| A/Mallard duck/Netherlands/17/2009 (H6N8)               | 2009-10-06  | KX978322 | KX978549 |
| A/Mallard duck/Netherlands/17/2011 (H3N8)               | 2011-09-20  | KX978036 | KX978560 |
| A/Mallard duck/Netherlands/18/2007 (H4N6)               | 2007-11-22  | KX979234 | KX978376 |
| A/Mallard duck/Netherlands/18/2009 (H6N2)               | 2009-10-08  | KX978564 | KX979049 |
| A/Mallard duck/Netherlands/18/2010 (H6N8)               | 2010-09-03  | KX979113 | KX977957 |
| A/Mallard duck/Netherlands/19/2007 (H6N2)               | 2007-12-07  | KX978966 | KX978008 |
| A/Mallard duck/Netherlands/19/2009 (H5N3)               | 2009-10-26  | KX978032 | KX978963 |
| A/Mallard duck/Netherlands/19/2012 (H4N6)               | 2012-09-07  | KX979134 | KX978671 |
| A/Mallard duck/Netherlands/2/2007 (H10N7)               | 2007-01-01* | KX978494 | KX979021 |
| A/Mallard duck/Netherlands/2/2008 (H10N7)               | 2008-01-07  | KX978964 | KX978237 |
| A/Mallard duck/Netherlands/2/2009 (H7N7)                | 2009-01-09  | KX978114 | KX978763 |
| A/Mallard duck/Netherlands/2/2011 (H10N7)               | 2011-03-08  | KX978624 | KX979161 |
| A/Mallard duck/Netherlands/2/2015 (H7N7)                | 2015-01-16  | KX979185 | KX978353 |
| A/Mallard duck/Netherlands/20/2009 (H5N3)               | 2009-10-26  | KX978388 | KX977757 |
| A/Mallard duck/Netherlands/20/2011 (H6N8)               | 2011-09-24  | KX978022 | KX979447 |

|                                            |            |          |          |
|--------------------------------------------|------------|----------|----------|
| A/Mallard duck/Netherlands/22/2010 (H10N7) | 2010-09-07 | KX978006 | KX978632 |
| A/Mallard duck/Netherlands/23/2006 (H1N1)  | 2006-08-25 | KX979325 | KX978811 |
| A/Mallard duck/Netherlands/23/2012 (H11N9) | 2012-09-27 | KX977778 | KX977684 |
| A/Mallard duck/Netherlands/24/2009 (H6N1)  | 2009-12-01 | KX978844 | KX978238 |
| A/Mallard duck/Netherlands/24/2013 (H4N6)  | 2013-09-16 | KX978385 | KX978890 |
| A/Mallard duck/Netherlands/26/2010 (H4N6)  | 2010-09-13 | KX979423 | KX979292 |
| A/Mallard duck/Netherlands/26/2011 (H11N9) | 2011-10-10 | KX979452 | KX978692 |
| A/Mallard duck/Netherlands/27/2009 (H4N6)  | 2009-12-21 | KX978295 | KX978169 |
| A/Mallard duck/Netherlands/28/2008 (H5N6)  | 2008-09-22 | KX977852 | KX978060 |
| A/Mallard duck/Netherlands/28/2009 (H1N1)  | 2009-12-21 | KX977807 | KX978631 |
| A/Mallard duck/Netherlands/28/2010 (H5N2)  | 2010-09-17 | KX979224 | KX977947 |
| A/Mallard duck/Netherlands/29/2008 (H11N9) | 2008-09-22 | KX978267 | KX978971 |
| A/Mallard duck/Netherlands/29/2009 (H11N9) | 2009-12-21 | KX977705 | KX977840 |
| A/Mallard duck/Netherlands/3/2008 (H6N2)   | 2008-01-07 | KX977797 | KX978336 |
| A/Mallard duck/Netherlands/3/2015 (H7N7)   | 2015-01-24 | KX978067 | KX979143 |
| A/Mallard duck/Netherlands/30/2008 (H5N3)  | 2008-09-23 | KX978877 | KX978452 |
| A/Mallard duck/Netherlands/30/2010 (H3N8)  | 2010-09-21 | KX978097 | KX979363 |
| A/Mallard duck/Netherlands/30/2011 (H6N4)  | 2011-10-19 | KX979356 | KX979148 |
| A/Mallard duck/Netherlands/30/2014 (H4N6)  | 2014-07-21 | KX978886 | KX979350 |
| A/Mallard duck/Netherlands/31/2008 (H6N1)  | 2008-09-22 | KX978655 | KX978400 |
| A/Mallard duck/Netherlands/31/2012 (H7N1)  | 2012-01-10 | KX977922 | KX978711 |
| A/Mallard duck/Netherlands/31/2013 (H10N7) | 2013-05-20 | KX978193 | KX977867 |
| A/Mallard duck/Netherlands/32/2011 (H5N2)  | 2011-10-20 | KX979009 | KX978469 |
| A/Mallard duck/Netherlands/32/2013 (H10N7) | 2013-08-05 | KX977924 | KX978875 |
| A/Mallard duck/Netherlands/33/2014 (H10N7) | 2014-12-16 | KX978314 | KX979578 |
| A/Mallard duck/Netherlands/34/2006 (H3N8)  | 2006-09-11 | KX979215 | KX979577 |
| A/Mallard duck/Netherlands/36/2006 (H5N3)  | 2006-09-11 | KX979003 | KX979553 |
| A/Mallard duck/Netherlands/36/2008 (H11N9) | 2008-09-23 | KX978075 | KX978903 |
| A/Mallard duck/Netherlands/37/2011 (H1N1)  | 2011-12-08 | KX977882 | KX979536 |
| A/Mallard duck/Netherlands/40/2006 (H6N8)  | 2006-09-16 | KX977839 | KX978188 |
| A/Mallard duck/Netherlands/43/2006 (H5N2)  | 2006-09-18 | KX979501 | KX978545 |
| A/Mallard duck/Netherlands/43/2011 (H7N1)  | 2011-12-24 | KX977677 | KX978462 |
| A/Mallard duck/Netherlands/44/2011 (H7N1)  | 2011-12-24 | KX978740 | KX977735 |
| A/Mallard duck/Netherlands/47/2010 (H10N7) | 2010-11-26 | KX978640 | KX977904 |
| A/Mallard duck/Netherlands/5/2008 (H6N8)   | 2008-09-10 | KX979551 | KX977649 |
| A/Mallard duck/Netherlands/5/2009 (H5N2)   | 2009-02-02 | KX977767 | KX978896 |
| A/Mallard duck/Netherlands/5/2012 (H10N7)  | 2012-05-12 | KX978848 | KX979065 |
| A/Mallard duck/Netherlands/5/2013 (H1N1)   | 2013-09-16 | KX979268 | KX978982 |
| A/Mallard duck/Netherlands/51/2010 (H1N1)  | 2010-12-03 | KX978723 | KX978328 |
| A/Mallard duck/Netherlands/52/2008 (H5N2)  | 2008-10-09 | KX979499 | KX977925 |
| A/Mallard duck/Netherlands/53/2010 (H1N1)  | 2010-12-08 | KX978255 | KX977899 |
| A/Mallard duck/Netherlands/55/2008 (H4N6)  | 2008-10-06 | KX978110 | KX978178 |
| A/Mallard duck/Netherlands/6/2006 (H4N6)   | 2006-06-03 | KX977697 | KX979028 |
| A/Mallard duck/Netherlands/6/2013 (H3N8)   | 2013-10-01 | KX979335 | KX979409 |
| A/Mallard duck/Netherlands/6/2015 (H10N7)  | 2015-03-04 | KX978577 | KX978040 |
| A/Mallard duck/Netherlands/60/2008 (H7N1)  | 2008-10-15 | KX978337 | KX979011 |
| A/Mallard duck/Netherlands/64/2006 (H1N1)  | 2006-09-22 | KX978552 | KX977762 |
| A/Mallard duck/Netherlands/67/2008 (H10N7) | 2008-12-13 | KX979437 | KX977963 |
| A/Mallard duck/Netherlands/7/2008 (H3N8)   | 2008-08-22 | KX978132 | KX978054 |
| A/Mallard duck/Netherlands/7/2009 (H7N7)   | 2009-02-02 | KX977692 | KX978598 |
| A/Mallard duck/Netherlands/7/2011 (H4N6)   | 2011-08-15 | KX978670 | KX977749 |

|                                           |             |          |          |
|-------------------------------------------|-------------|----------|----------|
| A/Mallard duck/Netherlands/7/2012 (H1N1)  | 2012-07-09  | KX978074 | KX978447 |
| A/Mallard duck/Netherlands/7/2014 (H6N2)  | 2014-10-01  | KX978776 | KX979466 |
| A/Mallard duck/Netherlands/76/2008 (H6N8) | 2008-11-27  | KX978130 | KX978245 |
| A/Mallard duck/Netherlands/77/2008 (H7N1) | 2008-12-29  | KX977881 | KX978814 |
| A/Mallard duck/Netherlands/78/2006 (H6N8) | 2006-10-21  | KX978159 | KX977724 |
| A/Mallard duck/Netherlands/8/2008 (H6N1)  | 2008-09-27  | KX978779 | KX977984 |
| A/Mallard duck/Netherlands/8/2012 (H1N1)  | 2012-10-23  | KX979169 | KX977770 |
| A/Mallard duck/Netherlands/82/2008 (H7N7) | 2008-12-17  | KX979315 | KX979225 |
| A/Mallard duck/Netherlands/9/2013 (H6N8)  | 2013-10-15  | KX979493 | KX979138 |
| A/Mute swan/Netherlands/2/2006 (H4N6)     | 2006-01-01* | KX978073 | KX979448 |
| A/Mute swan/Netherlands/3/2006 (H4N6)     | 2006-01-01* | KX977958 | KX978909 |
| A/Turnstone/Netherlands/1/2010 (H3N8)     | 2010-10-09  | KX979124 | KX977713 |
| A/Turnstone/Netherlands/2/2007 (H3N8)     | 2007-07-31  | KX979144 | KX978279 |
| A/Turnstone/Netherlands/3/2008 (H3N8)     | 2008-10-31  | KX978665 | KX979101 |
| A/Turnstone/Netherlands/4/2008 (H3N8)     | 2008-11-01  | KX978661 | KX979097 |

\* date unknown, set to 1<sup>st</sup> of January

**Supplementary Table S2. GISAID accession numbers of poultry virus sequences.**

GISAID's EpiFlu database accession numbers of hemagglutinin (HA) and neuraminidase (NA) gene segment sequences of low pathogenic avian influenza (LPAI) viruses from poultry, detected as part of the national avian influenza (AI) surveillance program in the Netherlands, January 2006-September 2016.

| <b>Isolate name</b>                                 | <b>Collection date</b> | <b>GISAID HA segment ID</b> | <b>GISAID NA segment ID</b> |
|-----------------------------------------------------|------------------------|-----------------------------|-----------------------------|
| A/Chicken/Netherlands/06022003/2006 (H7N7)          | 2006-08-01             | EPI1229818                  | EPI1229817                  |
| A/Chicken/Netherlands/09006942/2009 (H10N7)         | 2009-04-15             | EPI1229826                  | EPI1229825                  |
| A/Chicken/Netherlands/10007882/2010 (H7N4)          | 2010-05-14             | EPI1229834                  | EPI1229833                  |
| A/Chicken/Netherlands/10008427/2010 (H10N7)         | 2010-05-20             | EPI966037                   | EPI966050                   |
| A/Chicken/Netherlands/10009401/2010 (H8N4)          | 2010-06-04             | EPI1229842                  | EPI1229841                  |
| A/Chicken/Netherlands/10010413/2010 (H6N1)          | 2010-06-21             | EPI1229850                  | EPI1229849                  |
| A/Chicken/Netherlands/10012103/2010 (H6N1)          | 2010-07-19             | EPI1229858                  | EPI1229857                  |
| A/Chicken/Netherlands/10020245/2010 (H9N2)          | 2010-12-10             | EPI1229866                  | EPI1229865                  |
| A/Chicken/Netherlands/11004004/2011 (H8N4)          | 2011-03-09             | EPI1229874                  | EPI1229873                  |
| A/Chicken/Netherlands/11004875/2011 (H7N1)          | 2011-03-22             | EPI1229882                  | EPI1229881                  |
| A/Chicken/Netherlands/11008325/2011 (H8N4)          | 2011-05-10             | EPI1229890                  | EPI1229889                  |
| A/Chicken/Netherlands/11008327/2011 (H7N7)          | 2011-05-12             | EPI1230758                  | EPI1230760                  |
| A/Chicken/Netherlands/11009919/2011 (H1N1)          | 2011-05-30             | EPI1229898                  | EPI1229897                  |
| A/Chicken/Netherlands/11011392/2011 (H7N7)          | 2011-06-22             | EPI1229906                  | EPI1229905                  |
| A/Chicken/Netherlands/12002495-001-005/2012 (H10N9) | 2012-02-06             | EPI1229914                  | EPI1229913                  |
| A/Chicken/Netherlands/12014794/2012 (H7N7)          | 2012-08-09             | EPI1229922                  | EPI1229921                  |
| A/Chicken/Netherlands/13003601/2013 (H7N7)          | 2013-03-12             | EPI1229930                  | EPI1229929                  |
| A/Chicken/Netherlands/13003983/2013 (H7N7)          | 2013-03-18             | EPI1229938                  | EPI1229937                  |
| A/Chicken/Netherlands/13015884/2013 (H5N3)          | 2013-11-29             | EPI1229946                  | EPI1229945                  |
| A/Chicken/Netherlands/13016263-031-035/2013 (H5N3)  | 2013-12-10             | EPI1229954                  | EPI1229953                  |
| A/Chicken/Netherlands/14002541/2014 (H5N1)          | 2014-02-25             | EPI1229962                  | EPI1229961                  |
| A/Chicken/Netherlands/14003005/2014 (H2N7)          | 2014-03-05             | EPI1229970                  | EPI1229969                  |
| A/Chicken/Netherlands/14003323/2014 (H5N2)          | 2014-03-12             | EPI1229978                  | EPI1229977                  |
| A/Chicken/Netherlands/14004070/2014 (H9N1)          | 2014-03-26             | EPI1229986                  | EPI1229985                  |
| A/Chicken/Netherlands/15005968-056060/2015 (H5N2)   | 2015-04-02             | EPI1230063                  | EPI1230062                  |
| A/Chicken/Netherlands/15007212/2015 (H10N7)         | 2015-04-28             | EPI774514                   | EPI774516                   |
| A/Chicken/Netherlands/16007311-037041/2016 (H7N9)   | 2016-06-08             | EPI773765                   | EPI773767                   |
| A/Chicken/Netherlands/16010778-021-025/2016 (H2N3)  | 2016-08-30             | EPI1230079                  | EPI1230078                  |
| A/Chicken/NL-Barneveld/15004745-001-005/2015 (H7N7) | 2015-03-11             | EPI629344                   | EPI629341                   |
| A/Duck/Netherlands/06027358/2006 (H3N8)             | 2006-09-27             | EPI1230087                  | EPI1230086                  |
| A/Duck/Netherlands/14015610/2014 (H6N2)             | 2014-11-17             | EPI1230095                  | EPI1230094                  |
| A/Duck/Netherlands/14016168/2014 (H6N8)             | 2014-11-25             | EPI1230103                  | EPI1230102                  |
| A/Duck/Netherlands/14016396/2014 (H6N2)             | 2014-11-25             | EPI1230111                  | EPI1230110                  |
| A/Turkey/Netherlands/06001571/2006 (H6N5)           | 2006-01-24             | EPI1229994                  | EPI1229993                  |
| A/Turkey/Netherlands/07014290/2007 (H1N5)           | 2007-05-31             | EPI1230002                  | EPI1230001                  |
| A/Turkey/Netherlands/07016245/2007 (H1N5)           | 2007-06-22             | EPI1230010                  | EPI1230009                  |
| A/Turkey/Netherlands/09006938/2009 (H10N7)          | 2009-04-14             | EPI1230018                  | EPI1230017                  |
| A/Turkey/Netherlands/11011530/2011 (H7N7)           | 2011-06-25             | EPI1230026                  | EPI1230025                  |
| A/Turkey/Netherlands/11015452/2011 (H9N2)           | 2011-08-31             | EPI1230034                  | EPI1230033                  |
| A/Turkey/Netherlands/12004763-001-004/2012 (H10N9)  | 2012-03-05             | EPI1230042                  | EPI1230041                  |
| A/Turkey/Netherlands/12005615/2012 (H10N9)          | 2012-03-13             | EPI1230050                  | EPI1230049                  |
| A/Turkey/Netherlands/13001007/2013 (H8N4)           | 2013-01-18             | EPI1230127                  | EPI1230126                  |

### Supplementary Table S3. Collection and subtyping of wild bird samples.

Number of wild birds sampled and number of subtyped cases of low pathogenic avian influenza (LPAI) virus detections per wild bird species as part of the national avian influenza (AI) surveillance program in the Netherlands, January 2006-September 2016. A case is considered subtyped if the hemagglutinin (HA) or neuraminidase (NA) subtype of the virus is determined.

| Order                 | Group           | Species             | Latin name                   | Number of birds sampled           | Number of subtyped cases |     |
|-----------------------|-----------------|---------------------|------------------------------|-----------------------------------|--------------------------|-----|
| Anseriformes          | Ducks           | Mallard             | <i>Anas platyrhynchos</i>    | 46939                             | 446                      |     |
|                       |                 | Eurasian Wigeon     | <i>Anas penelope</i>         | 10039                             | 22                       |     |
|                       |                 | Gadwall             | <i>Anas strepera</i>         | 1317                              | 5                        |     |
|                       |                 | Common Teal         | <i>Anas crecca</i>           | 1209                              | 8                        |     |
|                       |                 | Northern Pintail    | <i>Anas acuta</i>            | 372                               | 0                        |     |
|                       |                 | Northern Shoveler   | <i>Anas clypeata</i>         | 355                               | 1                        |     |
|                       |                 | Common Eider        | <i>Somateria mollissima</i>  | 99                                | 2                        |     |
|                       |                 | Other ducks         |                              | 312                               | 0                        |     |
|                       | Geese           | White-fronted Goose | <i>Anser albifrons</i>       | 12001                             | 31                       |     |
|                       |                 | Barnacle Goose      | <i>Branta leucopsis</i>      | 4933                              | 8                        |     |
|                       |                 | Greylag Goose       | <i>Anser anser</i>           | 1924                              | 1                        |     |
|                       |                 | Egyptian Goose      | <i>Alopochen aegyptiacus</i> | 1159                              | 0                        |     |
|                       |                 | Bean Goose          | <i>Anser fabalis</i>         | 1095                              | 3                        |     |
|                       |                 | Brent Goose         | <i>Branta bernicla</i>       | 858                               | 1                        |     |
|                       |                 | Canada Goose        | <i>Branta canadensis</i>     | 326                               | 0                        |     |
|                       |                 | Pink-footed Goose   | <i>Anser brachyrhynchus</i>  | 206                               | 1                        |     |
|                       |                 | Other geese         |                              | 110                               | 0                        |     |
|                       |                 | Swans               | Mute Swan                    | <i>Cygnus olor</i>                | 2126                     | 3   |
|                       | Bewick's Swan   |                     | <i>Cygnus bewickii</i>       | 250                               | 14                       |     |
|                       | Other swans     |                     |                              | 46                                | 0                        |     |
|                       | Charadriiformes | Gulls               | Black-headed Gull            | <i>Chroicocephalus ridibundus</i> | 14170                    | 401 |
|                       |                 |                     | Common Gull                  | <i>Larus canus</i>                | 2087                     | 0   |
|                       |                 |                     | Herring Gull                 | <i>Larus argentatus</i>           | 1024                     | 10  |
|                       |                 |                     | Lesser Black-backed Gull     | <i>Larus fuscus</i>               | 894                      | 4   |
|                       |                 |                     | Mediterranean Gull           | <i>Larus Melanocephalus</i>       | 207                      | 1   |
|                       |                 |                     | Great Black-backed Gull      | <i>Larus marinus</i>              | 31                       | 1   |
|                       |                 |                     | Other gulls                  |                                   | 51                       | 0   |
| Waders                |                 | Turnstone           | <i>Arenaria interpres</i>    | 911                               | 14                       |     |
|                       |                 | Dunlin              | <i>Calidris alpina</i>       | 654                               | 4                        |     |
|                       |                 | Oystercatcher       | <i>Haematopus ostralegus</i> | 724                               | 0                        |     |
|                       |                 | Red Knot            | <i>Calidris canutus</i>      | 163                               | 0                        |     |
|                       |                 | Other waders        |                              | 177                               | 0                        |     |
| Other Charadriiformes |                 |                     |                              | 351                               | 0                        |     |
| Other                 |                 |                     |                              | 2172                              | 0                        |     |
| Unknown               |                 |                     |                              | 1822                              | 0                        |     |
| Total                 |                 |                     |                              | 111114                            | 981                      |     |

**Supplementary Table S4. Collection and subtyping of poultry samples.**

Number of serologically tested poultry farms and number of subtyped cases of low pathogenic avian influenza (LPAI) virus detections per poultry type as part of the national avian influenza (AI) surveillance program in the Netherlands, January 2006-September 2016. A case is considered if the hemagglutinin (HA) or neuraminidase (NA) subtype of the virus or the subtype-specificity of the influenza virus-specific antibodies is determined.

| <b>Poultry type</b> | <b>Housing system</b> | <b>Number of farms tested</b> | <b>Number of subtyped cases</b> |     |
|---------------------|-----------------------|-------------------------------|---------------------------------|-----|
| Chicken             | Layer                 | Indoor                        | 18883                           | 20  |
|                     |                       | Outdoor                       | 11797                           | 120 |
|                     |                       | Unknown                       |                                 | 8   |
|                     | Broiler               | 7309                          | 9                               |     |
|                     | Unknown               |                               | 10                              |     |
| Turkey              |                       | 2269                          | 33                              |     |
| Duck                |                       | 889                           | 13                              |     |
| Unknown             |                       | 662                           | 7                               |     |
| Total               |                       | 41769                         | 220                             |     |



### Supplementary Table S5. Poultry viruses and their most identical wild bird virus.

Low pathogenic avian influenza (LPAI) viruses isolated from poultry, detected as part of the national avian influenza (AI) surveillance program in the Netherlands, January 2006-September 2016, with their genetically most identical wild bird virus based on the hemagglutinin (HA) and neuraminidase (NA) gene segment sequences as determined by BLAST. The time interval between collection days and the percentage of nucleotide (nt) sequence identity between the poultry virus and the most identical wild bird virus are shown. We gratefully acknowledge the authors, originating and submitting laboratories of the sequences from GISAID's EpiFlu database <sup>28</sup> on which this research is based. All submitters of data may be contacted directly via the GISAID website (<http://www.gisaid.org>).

| Year | Poultry virus                               | Location poultry virus (province – city) | Segment | Most identical wild bird virus                           | Location wild bird virus (continent – country – province) | Time interval (days) | Sequence identity (%) |
|------|---------------------------------------------|------------------------------------------|---------|----------------------------------------------------------|-----------------------------------------------------------|----------------------|-----------------------|
| 2006 | A/Turkey/Netherlands/06001571/2006 (H6N5)   | Noord Brabant - Dinteloord               | HA      | A/Greater white-fronted goose/Netherlands/ 1/2006 (H6N2) | EU - NL - Noord Brabant                                   | 10                   | 99.5%                 |
|      |                                             |                                          | NA      | A/Mallard/Sweden/343/2002 (H12N5)                        | EU - Sweden                                               | 1181                 | 98.7%                 |
|      | A/Chicken/Netherlands/06022003/2006 (H7N7)  | Gelderland - Voorthuizen                 | HA      | A/Mallard Duck/Netherlands/ 60/2008 (H7N1)               | EU - NL - Noord Holland                                   | -806                 | 99.5%                 |
|      |                                             |                                          | NA      | A/Mallard/Sweden/5927/2005 (H7N7)                        | EU - Sweden                                               | 251                  | 98.7%                 |
|      |                                             |                                          | NA      | A/Mallard/Sweden/5944/2005 (H7N7)                        | EU - Sweden                                               | 248                  |                       |
|      |                                             |                                          | NA      | A/Mallard/Sweden/95/2005 (H7N7)                          | EU - Sweden                                               | 577                  |                       |
|      | A/Duck/Netherlands/06027358/2006 (H3N8)     | Gelderland - Nijmegen                    | HA      | A/Mallard Duck/Netherlands/ 60/2006 (H3N8)               | EU - NL - Noord Holland                                   | 9                    | 99.8%                 |
|      |                                             |                                          | NA      | A/Mallard Duck/Netherlands/ 60/2006 (H3N8)               | EU - NL - Noord Holland                                   | 9                    | 99.8%                 |
| 2007 | A/Turkey/Netherlands/07014290/2007 (H1N5)   | Limburg - Nederweert                     | HA      | A/Bewicks swan/Netherlands/ 1/2007 (H1N5)                | EU - NL - Friesland                                       | 150                  | 98.9%                 |
|      |                                             |                                          | NA      | A/Black-headed gull/Netherlands/ 1/2006 (H4N5)           | EU - NL - Gelderland                                      | 515                  | 98.5%                 |
|      | A/Turkey/Netherlands/07016245/2007 (H1N5)   | Limburg - Weert                          | HA      | A/Bewicks swan/Netherlands/ 1/2007 (H1N5)                | EU - NL - Friesland                                       | 172                  | 99.0%                 |
|      |                                             |                                          | NA      | A/Black-headed gull/Netherlands/ 1/2006 (H4N5)           | EU - NL - Gelderland                                      | 537                  | 98.5%                 |
| 2009 | A/Turkey/Netherlands/09006938/2009 (H10N7)  | Noord Brabant - Deurne                   | HA      | A/Mallard/Sweden/64476/2007 (H10N4)                      | EU - Sweden                                               | 677                  | 98.9%                 |
|      |                                             |                                          | NA      | A/Anas_platyrhynchos/Camargue/091863/09 (H10N7)          | EU - France                                               | -36                  | 99.8%                 |
|      | A/Chicken/Netherlands/09006942/2009 (H10N7) | Noord Brabant - Deurne                   | HA      | A/Mallard/Sweden/64476/2007 (H10N4)                      | EU - Sweden                                               | 678                  | 98.8%                 |
|      |                                             |                                          | NA      | A/Mallard/Sweden/93475/2009 (H10N6)                      | EU - Sweden                                               | -130                 |                       |
|      |                                             |                                          | NA      | A/Anas_platyrhynchos/Camargue/091863/09 (H10N7)          | EU - France                                               | -35                  | 99.8%                 |
|      |                                             |                                          | NA      | A/Mallard Duck/Netherlands/ 82/2008 (H7N7)               | EU - NL - Zuid Holland                                    | 119                  |                       |
| 2010 | A/Chicken/Netherlands/10007882/2010 (H7N4)  | Noord Brabant - Deurne                   | HA      | A/Mallard Duck/Netherlands/ 60/2008 (H7N1)               | EU - NL - Noord Holland                                   | 576                  | 99.1%                 |
|      |                                             |                                          | NA      | A/Teal/Chany/7119/2008 (H15N4)                           | EU - Russia                                               | 622                  | 99.1%                 |
|      | A/Chicken/Netherlands/10008427/2010 (H10N7) | Friesland – Drachtstercompagnie          | HA      | A/Mallard/Netherlands/ 67/2008 (H10N7)                   | EU - NL - Friesland                                       | 523                  | 99.0%                 |
|      |                                             |                                          | NA      | A/Mallard/Netherlands/ 67/2008 (H10N7)                   | EU - NL - Friesland                                       | 523                  | 99.0%                 |
|      |                                             |                                          | NA      | A/Mallard/Netherlands/ 82/2008 (H10N7)                   | EU - NL - Friesland                                       | 519                  |                       |
|      |                                             |                                          | NA      | A/Mallard/Netherlands/ 1/2009 (H10N7)                    | EU - NL - Friesland                                       | 470                  |                       |
|      | A/Chicken/Netherlands/10009401/2010 (H8N4)  | Friesland - Hiaure                       | HA      | A/Mallard/Sweden/99377/2009 (H8N4)                       | EU - Sweden                                               | 274                  | 98.5%                 |
|      |                                             |                                          | NA      | A/Teal/Chany/7119/2008 (H15N4)                           | EU - Russia                                               | 643                  | 99.2%                 |

|      |                                                     |                              |    |                                                          |                         |      |       |
|------|-----------------------------------------------------|------------------------------|----|----------------------------------------------------------|-------------------------|------|-------|
|      | A/Chicken/Netherlands/10010413/2010 (H6N1)          | Friesland - Idsegahuizum     | HA | A/Mallard Duck/Netherlands/ 18/2010 (H6N8)               | EU - NL - Zuid Holland  | -74  | 98.8% |
|      |                                                     |                              | NA | A/Mallard/Bavaria/185-8/2008 (H1N1)                      | EU - Germany            | 637  | 99.2% |
|      | A/Chicken/Netherlands/10012103/2010 (H6N1)          | Friesland - Parrega          | HA | A/Mallard Duck/Netherlands/ 18/2010 (H6N8)               | EU - NL - Zuid Holland  | -46  | 98.8% |
|      |                                                     |                              | NA | A/Mallard/Bavaria/185-8/2008 (H1N1)                      | EU - Germany            | 665  | 99.1% |
|      | A/Chicken/Netherlands/10020245/2010 (H9N2)          | Zuid Holland - Pijnacker     | HA | A/Bewicks swan/Netherlands/ 4/2006 (H9N2)                | EU - NL - Noord Holland | 1484 | 96.6% |
|      |                                                     |                              | NA | A/Mallard Duck/Netherlands/ 53/2006 (H4N2)               | EU - NL - Noord Holland | 1544 | 98.0% |
|      |                                                     |                              |    | A/Mallard/Netherlands/ 7/2007 (H4N2)                     | EU - NL - Zuid Holland  | 1439 |       |
| 2011 | A/Chicken/Netherlands/11004004/2011 (H8N4)          | Utrecht - Vreeland           | HA | A/Common Teal/Netherlands/ 12002960/2012 (H8N4)          | EU - NL - Noord Holland | -359 | 99.2% |
|      |                                                     |                              | NA | A/Common Teal/Netherlands/ 12002960/2012 (H8N4)          | EU - NL - Noord Holland | -359 | 99.5% |
|      | A/Chicken/Netherlands/11004875/2011 (H7N1)          | Zeeland - Schore             | HA | A/Swan/Czech Republic/5416/2011 (H7N7)                   | EU - Czech Republic     | -15  | 99.5% |
|      |                                                     |                              | NA | A/Mallard Duck/Netherlands/ 51/2010 (H1N1)               | EU - NL - Zuid Holland  | 109  | 99.6% |
|      | A/Chicken/Netherlands/11008325/2011 (H8N4)          | Gelderland - Lunteren        | HA | A/Mallard/Sweden/101165/2009 (H8N4)                      | EU - Sweden             | 551  | 99.2% |
|      |                                                     |                              | NA | A/Mallard/Sweden/133546/2011 (H10N4)                     | EU - Sweden             | -197 | 99.4% |
|      | A/Chicken/Netherlands/11008327/2011 (H7N7)          | Gelderland - Kootwijkerbroek | HA | A/Mallard Duck/Netherlands/ 1/2011 (H7N7)                | EU - NL - Noord Holland | 78   | 99.4% |
|      |                                                     |                              | NA | A/Mallard Duck/Netherlands/ 1/2011 (H7N7)                | EU - NL - Noord Holland | 78   | 98.8% |
|      | A/Chicken/Netherlands/11009919/2011 (H1N1)          | Zuid Holland - Stolwijk      | HA | A/Greater white-fronted goose/Netherlands/ 4/2011 (H1N1) | EU - NL - Noord Brabant | 133  | 98.8% |
|      |                                                     |                              | NA | A/Greater white-fronted goose/Netherlands/ 4/2011 (H1N1) | EU - NL - Noord Brabant | 133  | 99.9% |
|      | A/Chicken/Netherlands/11011392/2011 (H7N7)          | Flevoland - Creil            | HA | A/Mallard Duck/Netherlands/ 1/2011 (H7N7)                | EU - NL - Noord Holland | 120  | 99.3% |
|      | A/Chicken/Netherlands/11011326/2011 (H7N7)*         |                              | NA | A/Mallard Duck/Netherlands/ 1/2011 (H7N7)                | EU - NL - Noord Holland | 120  | 98.8% |
|      | A/Turkey/Netherlands/11011530/2011 (H7N7)           | Flevoland - Creil            | HA | A/Mallard Duck/Netherlands/ 1/2011 (H7N7)                | EU - NL - Noord Holland | 122  | 99.3% |
|      |                                                     |                              | NA | A/Mallard Duck/Netherlands/ 1/2011 (H7N7)                | EU - NL - Noord Holland | 122  | 98.7% |
|      | A/Turkey/Netherlands/11015452/2011 (H9N2)           | Noord Brabant - Deurne       | HA | A/Anas platyrhynchos/Belgium/24311pcs5/2012 (H9N2)       | EU - Belgium            | -375 | 99.2% |
|      |                                                     |                              | NA | A/Mallard Duck/Netherlands/ 16/2012 (H3N2)               | EU - NL - Zuid Holland  | -352 | 99.1% |
| 2012 | A/Chicken/Netherlands/12002495-001-005/2012 (H10N9) | Noord Brabant - Heusden      | HA | A/Mallard/Sweden/105186/2009 (H10N1)                     | EU - Sweden             | 800  | 98.2% |
|      |                                                     |                              |    | A/Mallard/Sweden/105254/2009 (H10N1)                     | EU - Sweden             | 799  |       |
|      |                                                     |                              |    | A/Mallard/Sweden/105259/2009 (H10N1)                     | EU - Sweden             | 799  |       |
|      |                                                     |                              |    | A/Mallard/Sweden/105364/2009 (H10N1)                     | EU - Sweden             | 798  |       |
|      |                                                     |                              |    | A/Mallard/Sweden/105365/2009 (H10N1)                     | EU - Sweden             | 798  |       |
|      |                                                     |                              |    | A/Mallard/Sweden/105474/2009 (H10N1)                     | EU - Sweden             | 796  |       |
|      |                                                     |                              |    | A/Mallard/Sweden/107688/2009 (H10N1)                     | EU - Sweden             | 794  |       |
|      |                                                     |                              | NA | A/Mallard/Sweden/100878/2009 (H11N9)                     | EU - Sweden             | 827  | 99.0% |
|      |                                                     |                              |    | A/Mallard/Sweden/101011/2009 (H11N9)                     | EU - Sweden             | 825  |       |
|      |                                                     |                              |    | A/Mallard/Sweden/50980/2006 (H11N9)                      | EU - Sweden             | 1946 |       |
|      | A/Turkey/Netherlands/12004763-001-004/2012 (H10N9)  | Limburg - Ospel              | HA | A/Mallard/Sweden/105186/2009 (H10N1)                     | EU - Sweden             | 828  | 98.2% |
|      |                                                     |                              |    | A/Mallard/Sweden/105254/2009 (H10N1)                     | EU - Sweden             | 827  |       |
|      |                                                     |                              |    | A/Mallard/Sweden/105259/2009 (H10N1)                     | EU - Sweden             | 827  |       |
|      |                                                     |                              |    | A/Mallard/Sweden/105364/2009 (H10N1)                     | EU - Sweden             | 826  |       |
|      |                                                     |                              |    | A/Mallard/Sweden/105365/2009 (H10N1)                     | EU - Sweden             | 826  |       |

|                                            |                                                    |                         |                                                     |                                                     |                         |       |       |
|--------------------------------------------|----------------------------------------------------|-------------------------|-----------------------------------------------------|-----------------------------------------------------|-------------------------|-------|-------|
|                                            |                                                    |                         | A/Mallard/Sweden/105474/2009 (H10N1)                | EU - Sweden                                         | 824                     |       |       |
|                                            |                                                    |                         | A/Mallard/Sweden/107688/2009 (H10N1)                | EU - Sweden                                         | 822                     |       |       |
|                                            |                                                    | NA                      | A/Mallard/Sweden/100878/2009 (H11N9)                | EU - Sweden                                         | 855                     | 98.9% |       |
|                                            |                                                    |                         | A/Mallard/Sweden/101011/2009 (H11N9)                | EU - Sweden                                         | 853                     |       |       |
|                                            |                                                    |                         | A/Mallard/Sweden/50980/2006 (H11N9)                 | EU - Sweden                                         | 1974                    |       |       |
| A/Turkey/Netherlands/12005615/2012 (H10N9) | Limburg - Nederweert                               | HA                      | A/Mallard/Sweden/105186/2009 (H10N1)                | EU - Sweden                                         | 836                     | 98.2% |       |
|                                            |                                                    |                         | A/Mallard/Sweden/105254/2009 (H10N1)                | EU - Sweden                                         | 835                     |       |       |
|                                            |                                                    |                         | A/Mallard/Sweden/105259/2009 (H10N1)                | EU - Sweden                                         | 835                     |       |       |
|                                            |                                                    |                         | A/Mallard/Sweden/105364/2009 (H10N1)                | EU - Sweden                                         | 834                     |       |       |
|                                            |                                                    |                         | A/Mallard/Sweden/105365/2009 (H10N1)                | EU - Sweden                                         | 834                     |       |       |
|                                            |                                                    |                         | A/Mallard/Sweden/105474/2009 (H10N1)                | EU - Sweden                                         | 832                     |       |       |
|                                            |                                                    |                         | A/Mallard/Sweden/107688/2009 (H10N1)                | EU - Sweden                                         | 830                     |       |       |
|                                            |                                                    | NA                      | A/Mallard/Sweden/100878/2009 (H11N9)                | EU - Sweden                                         | 863                     | 98.8% |       |
|                                            |                                                    |                         | A/Mallard/Sweden/101011/2009 (H11N9)                | EU - Sweden                                         | 861                     |       |       |
|                                            |                                                    |                         | A/Mallard/Sweden/50980/2006 (H11N9)                 | EU - Sweden                                         | 1982                    |       |       |
| A/Chicken/Netherlands/12014794/2012 (H7N7) | Utrecht - Hagestein                                | HA                      | A/Anas platyrhynchos/Belgium/23852cls33/2012 (H7N7) | EU - Belgium                                        | -34                     | 99.4% |       |
|                                            |                                                    | NA                      | A/Swan/Czech Republic/5416/2011 (H7N7)              | EU - Czech Republic                                 | 491                     | 98.7% |       |
| 2013                                       | A/Turkey/Netherlands/13001007/2013 (H8N4)          | Noord Brabant - Helmond | HA                                                  | A/Mallard/Sweden/101165/2009 (H8N4)                 | EU - Sweden             | 1170  | 98.2% |
|                                            |                                                    |                         | NA                                                  | A/Mallard/Sweden/99377/2009 (H8N4)                  | EU - Sweden             | 1233  | 98.4% |
|                                            | A/Chicken/Netherlands/13003601/2013 (H7N7)         | Gelderland - Lochem     | HA                                                  | A/Anas platyrhynchos/Belgium/23852cls33/2012 (H7N7) | EU - Belgium            | 181   | 99.2% |
|                                            |                                                    |                         | NA                                                  | A/Swan/Czech Republic/5416/2011 (H7N7)              | EU - Czech Republic     | 706   |       |
|                                            |                                                    |                         | NA                                                  | A/Anas platyrhynchos/Belgium/23852cls33/2012 (H7N7) | EU - Belgium            | 181   | 99.2% |
|                                            | A/Chicken/Netherlands/13003983/2013 (H7N7)         | Flevoland - Zeewolde    | HA                                                  | A/Swan/Czech Republic/5416/2011 (H7N7)              | EU - Czech Republic     | 712   | 98.9% |
|                                            |                                                    |                         | NA                                                  | A/Mallard Duck/Netherlands/ 5/2012 (H10N7)          | EU - NL - Zuid Holland  | 310   | 98.7% |
|                                            | A/Chicken/Netherlands/13015884/2013 (H5N3)         | Groningen - Sint Annen  | HA                                                  | A/Razorbill/Scotland/7343/14 (H5Nx)                 | EU - United Kingdom     | -94   | 98.5% |
|                                            |                                                    |                         | NA                                                  | A/Mallard/Netherlands/ 29/2010 (H2N3)               | EU - NL - Noord Holland | 1428  | 98.7% |
|                                            |                                                    |                         | A/Mallard/Sweden/101900/2009 (H4N3)                 | EU - Sweden                                         | 1476                    |       |       |
|                                            | A/Chicken/Netherlands/13016263-031-035/2013 (H5N3) | Groningen - Scheemda    | HA                                                  | A/Razorbill/Scotland/7343/14 (H5Nx)                 | EU - United Kingdom     | -83   | 98.5% |
|                                            |                                                    |                         | NA                                                  | A/Mallard/Netherlands/ 29/2010 (H2N3)               | EU - NL - Noord Holland | 1439  | 98.8% |
|                                            |                                                    |                         | A/Mallard/Sweden/101900/2009 (H4N3)                 | EU - Sweden                                         | 1487                    |       |       |
| 2014                                       | A/Chicken/Netherlands/14002541/2014 (H5N1)         | Flevoland - Swifterbant | HA                                                  | A/Razorbill/Scotland/7343/14 (H5Nx)                 | EU - United Kingdom     | -6    | 98.8% |
|                                            |                                                    |                         | NA                                                  | A/Mallard/Republic of Georgia/4/2012 (H1N1)         | EU - Georgia            | 433   | 98.7% |
|                                            | A/Chicken/Netherlands/14003005/2014 (H2N7)         | Overijssel - Witharen   | HA                                                  | A/Great black-backed gull/Iceland/1395/2011 (H2N5)  | EU - Iceland            | 862   | 98.3% |
|                                            |                                                    |                         | A/Herring gull/Iceland/1320/2011 (H2N5)             | EU - Iceland                                        | 864                     |       |       |
|                                            |                                                    |                         | A/Herring gull/Iceland/1342/2011 (H2N5)             | EU - Iceland                                        | 862                     |       |       |
|                                            |                                                    |                         | A/Iceland gull/Iceland/1124/2011 (H2N5)             | EU - Iceland                                        | 871                     |       |       |
|                                            |                                                    | NA                      | A/Mallard Duck/Netherlands/ 21/2010 (H10N7)         | EU - NL - Noord Holland                             | 1275                    | 98.3% |       |
|                                            | A/Chicken/Netherlands/14003323/2014 (H5N2)         | Gelderland - Bruchem    | HA                                                  | A/Duck/Hunan/S4120/2011 (H5N2)                      | AS - China              | 852   | 97.6% |
|                                            |                                                    | NA                      | A/Wild bird/Korea/L60-2/2008 (H5N2)                 | AS - Republic of Korea                              | 1924                    | 97.7% |       |

|      |                                                     |                             |    |                                             |                         |      |       |
|------|-----------------------------------------------------|-----------------------------|----|---------------------------------------------|-------------------------|------|-------|
|      | A/Chicken/Netherlands/14004070/2014 (H9N1)          | Groningen - Uithuizermeeden | HA | A/Teal/Finland/10529/2010 (H9N2)            | EU - Finland            | 1545 | 99.3% |
|      |                                                     |                             | NA | A/Mallard/Sweden/816/2014 (H1N1)            | EU - Sweden             | -264 | 99.4% |
|      | A/Duck/Netherlands/14015610/2014 (H6N2)             | Utrecht - Lopik             | HA | A/Mallard Duck/Netherlands/ 10/2012 (H6N1)  | EU - NL - Noord Holland | 803  | 99.0% |
|      |                                                     |                             | NA | A/Swan/Netherlands/ 14000281/2014 (H5N2)    | EU - NL - Zuid Holland  | 313  | 99.7% |
|      | A/Duck/Netherlands/14016396/2014 (H6N2)             | Gelderland - Hierden        | HA | A/Mallard Duck/Netherlands/ 10/2012 (H6N1)  | EU - NL - Noord Holland | 811  | 99.0% |
|      |                                                     |                             | NA | A/Swan/Netherlands/ 14000281/2014 (H5N2)    | EU - NL - Zuid Holland  | 321  | 99.6% |
|      | A/Duck/Netherlands/14016168/2014 (H6N8)             | Gelderland - Putten         | HA | A/Mallard Duck/Netherlands/ 15/2011 (H6N8)  | EU - NL - Noord Holland | 1168 | 97.8% |
|      |                                                     |                             |    | A/Mallard Duck/Netherlands/ 20/2011 (H6N8)  | EU - NL - Noord Holland | 1158 |       |
|      |                                                     |                             | NA | A/Mallard Duck/Netherlands/ 15/2011 (H6N8)  | EU - NL - Noord Holland | 1168 | 98.2% |
| 2015 | A/Chicken/NL-Barneveld/15004745-001-005/2015 (H7N7) | Gelderland - Barneveld      | HA | A/Mallard Duck/Netherlands/ 23/2013 (H7N3)  | EU - NL - Zuid Holland  | 701  | 98.5% |
|      |                                                     |                             | NA | A/Mallard Duck/Netherlands/ 13/2013 (H7N7)  | EU - NL - Zuid Holland  | 456  | 98.8% |
|      | A/Chicken/Netherlands/15005968-056060/2015 (H5N2)   | Noord Brabant - Milheeze    | HA | A/Razorbill/Scotland/7343/14 (H5Nx)         | EU - United Kingdom     | 395  | 96.6% |
|      |                                                     |                             | NA | A/Mallard Duck/Netherlands/ 9/2014 (H6N2)   | EU - NL - Zuid Holland  | 156  | 99.4% |
|      | A/Chicken/Netherlands/15007212/2015 (H10N7)         | Noord Brabant - Heusden     | HA | A/Mallard Duck/Netherlands/ 31/2013 (H10N7) | EU - NL - Zuid Holland  | 708  | 97.9% |
|      |                                                     |                             |    | A/Mallard Duck/Netherlands/ 32/2013 (H10N7) | EU - NL - Zuid Holland  | 631  |       |
|      |                                                     |                             | NA | A/Mallard Duck/Netherlands/ 5/2012 (H10N7)  | EU - NL - Zuid Holland  | 1081 | 98.1% |
| 2016 | A/Chicken/Netherlands/16007311-037041/2016 (H7N9)   | Friesland - Hiaure          | HA | A/Mallard Duck/Netherlands/ 24/2014 (H7N3)  | EU - NL - Noord Holland | 617  | 99.4% |
|      |                                                     |                             | NA | A/Duck/Bangladesh/26980/2015 (H7N9)         | AS - Bangladesh         | 181  | 97.3% |
|      |                                                     |                             |    | A/Duck/Bangladesh/26992/2015 (H7N9)         | AS - Bangladesh         | 181  |       |
|      |                                                     |                             |    | A/Duck/Bangladesh/27042/2015 (H7N9)         | AS - Bangladesh         | 181  |       |
|      | A/Chicken/Netherlands/16010778-021-025/2016 (H2N3)  | Overijssel - Bathmen        | HA | A/Tufted Duck/Georgia/1/2012 (H2N3)         | EU - Georgia            | 1347 | 97.2% |
|      |                                                     |                             | NA | A/Mallard Duck/Netherlands/ 24/2014 (H7N3)  | EU - NL - Noord Holland | 700  | 98.9% |

AS, Asia; EU, Europe; NL, The Netherlands

\* two viruses were isolated from a single poultry farm

**Supplementary Figure S1. Phylogenetic trees of HA genes.**

Neighbour joining (NJ) phylogenetic trees of the hemagglutinin (HA) gene segments of low pathogenic avian influenza (LPAI) viruses from poultry, detected as part of the national avian influenza (AI) surveillance program in the Netherlands, January 2006-September 2016. Nucleotide (nt) sequences of cluster representatives, poultry viruses and top 50 BLAST hits were aligned for each HA separately: H1 (1659 nt), H2 (1679 nt), H3 (1699 nt), H5 (1571 nt), H6 (1596 nt), H7 (1494 nt), (H8 1626 nt), H9 (1567 nt) and H10 (1585 nt). Phylogenetic trees were generated using the Tamura-Nei substitution model with a gamma distribution (shape parameter = 1) for rate variation within the MEGA7 software package. Bootstrap support values above 70 (1,000 replicates) are shown at the branches. Colours represent cluster representatives (blue), poultry viruses (red), and most identical wild bird viruses as determined by BLAST (red). Symbols represent poultry viruses most identical to wild bird viruses isolated in the Netherlands (dots), other European countries (squares) and Asia (triangles). We gratefully acknowledge the authors, originating and submitting laboratories of the sequences from GISAID's EpiFlu database<sup>28</sup> on which this research is based. All submitters of data may be contacted directly via the GISAID website (<http://www.gisaid.org>).

# H1

- Cluster representative
- Poultry virus
- Most closely related wild bird virus

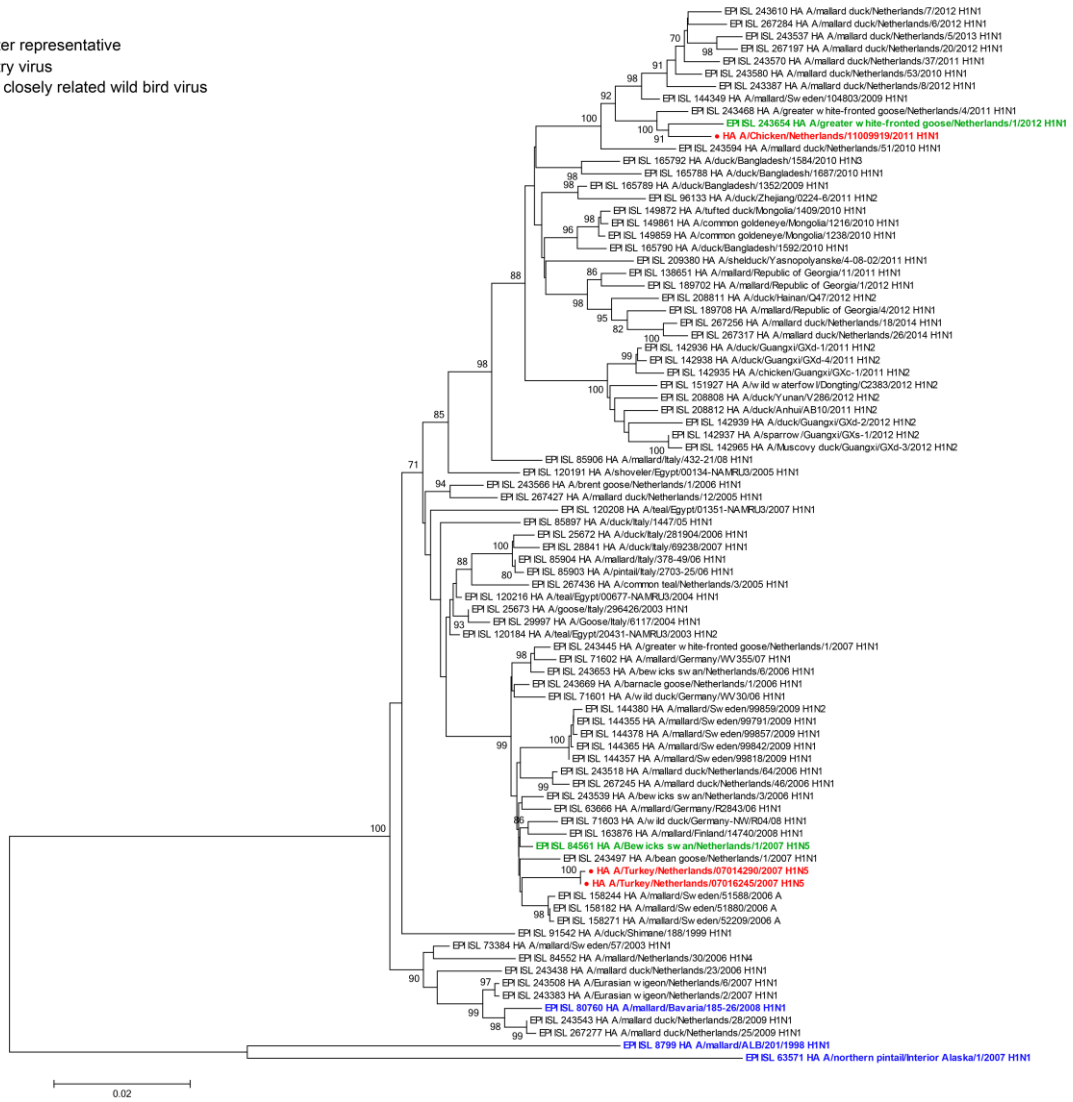

## H2

- Cluster representative
- Poultry virus
- Most closely related wild bird virus

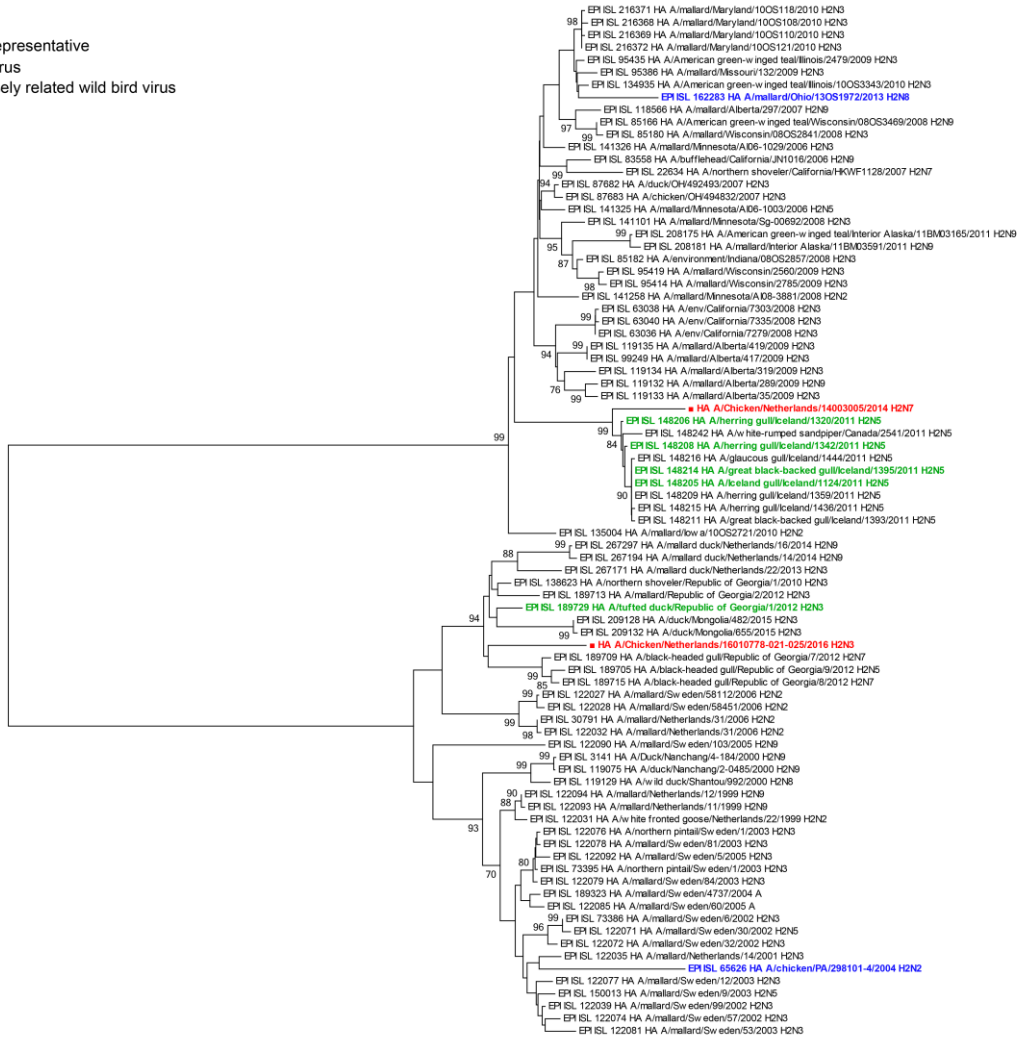

### H3

- Cluster representative
- Poultry virus
- Most closely related wild bird virus

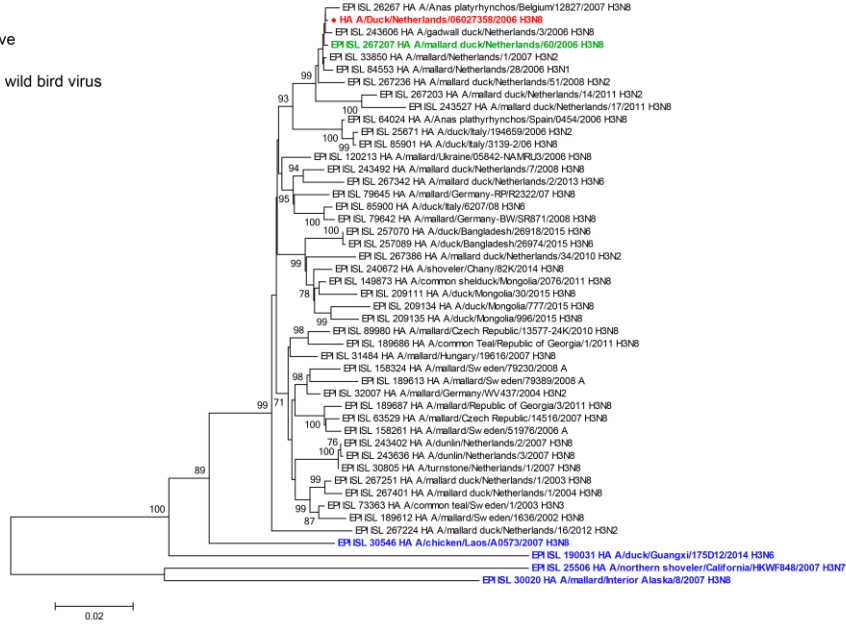



H5

- Cluster representative
- Poultry virus
- Most closely related wild bird virus

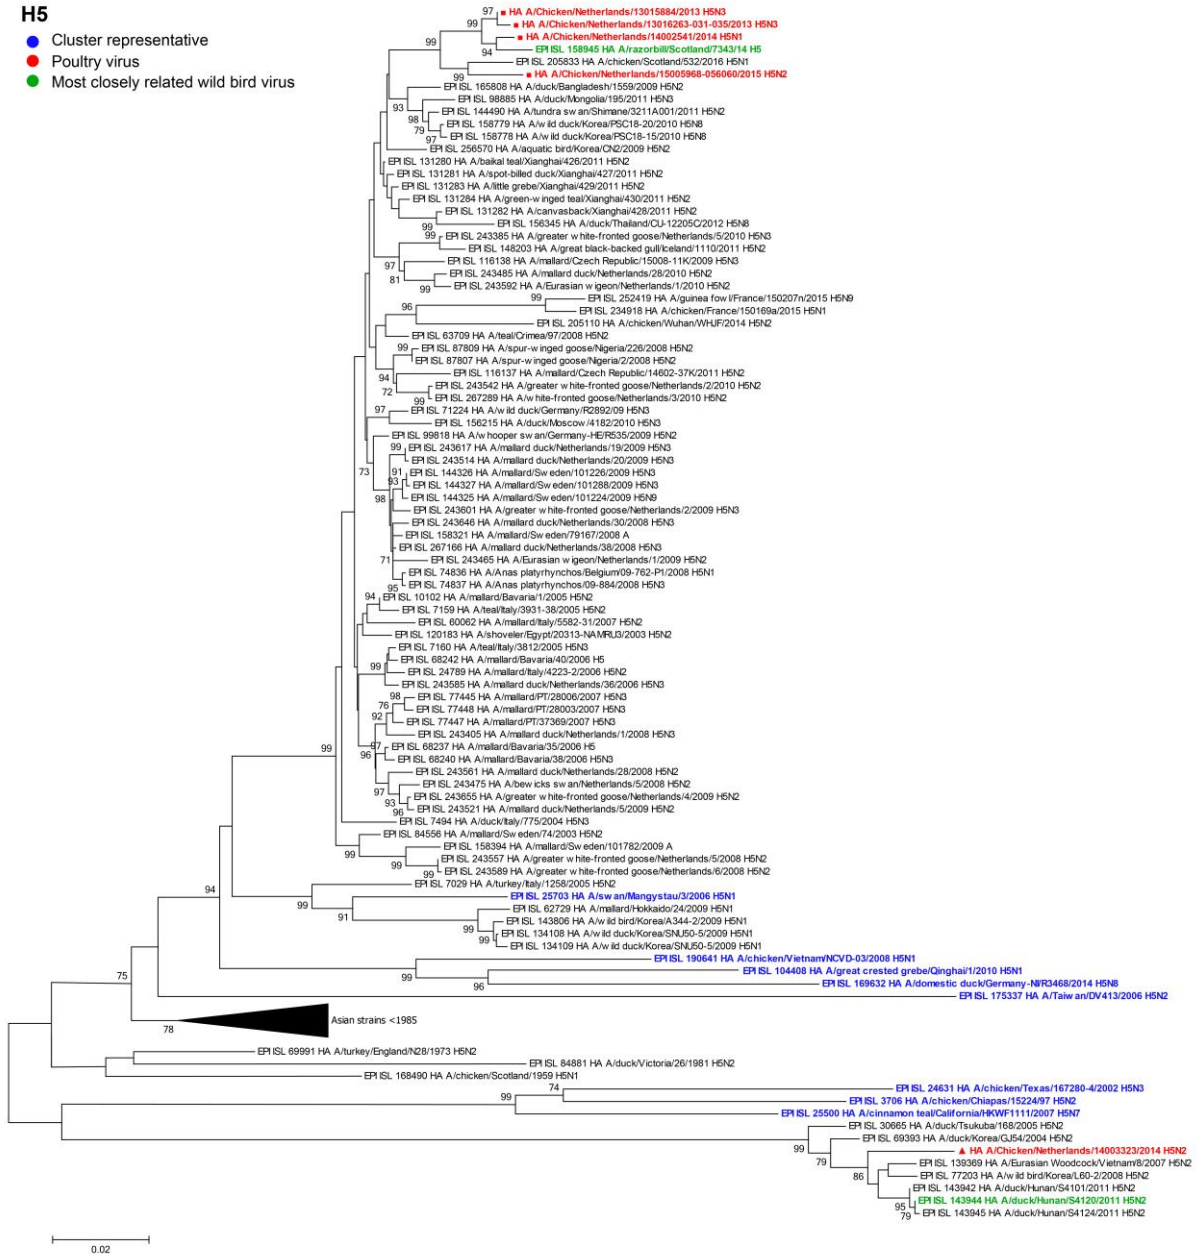

H6

- Cluster representative
- Poultry virus
- Most closely related wild bird virus

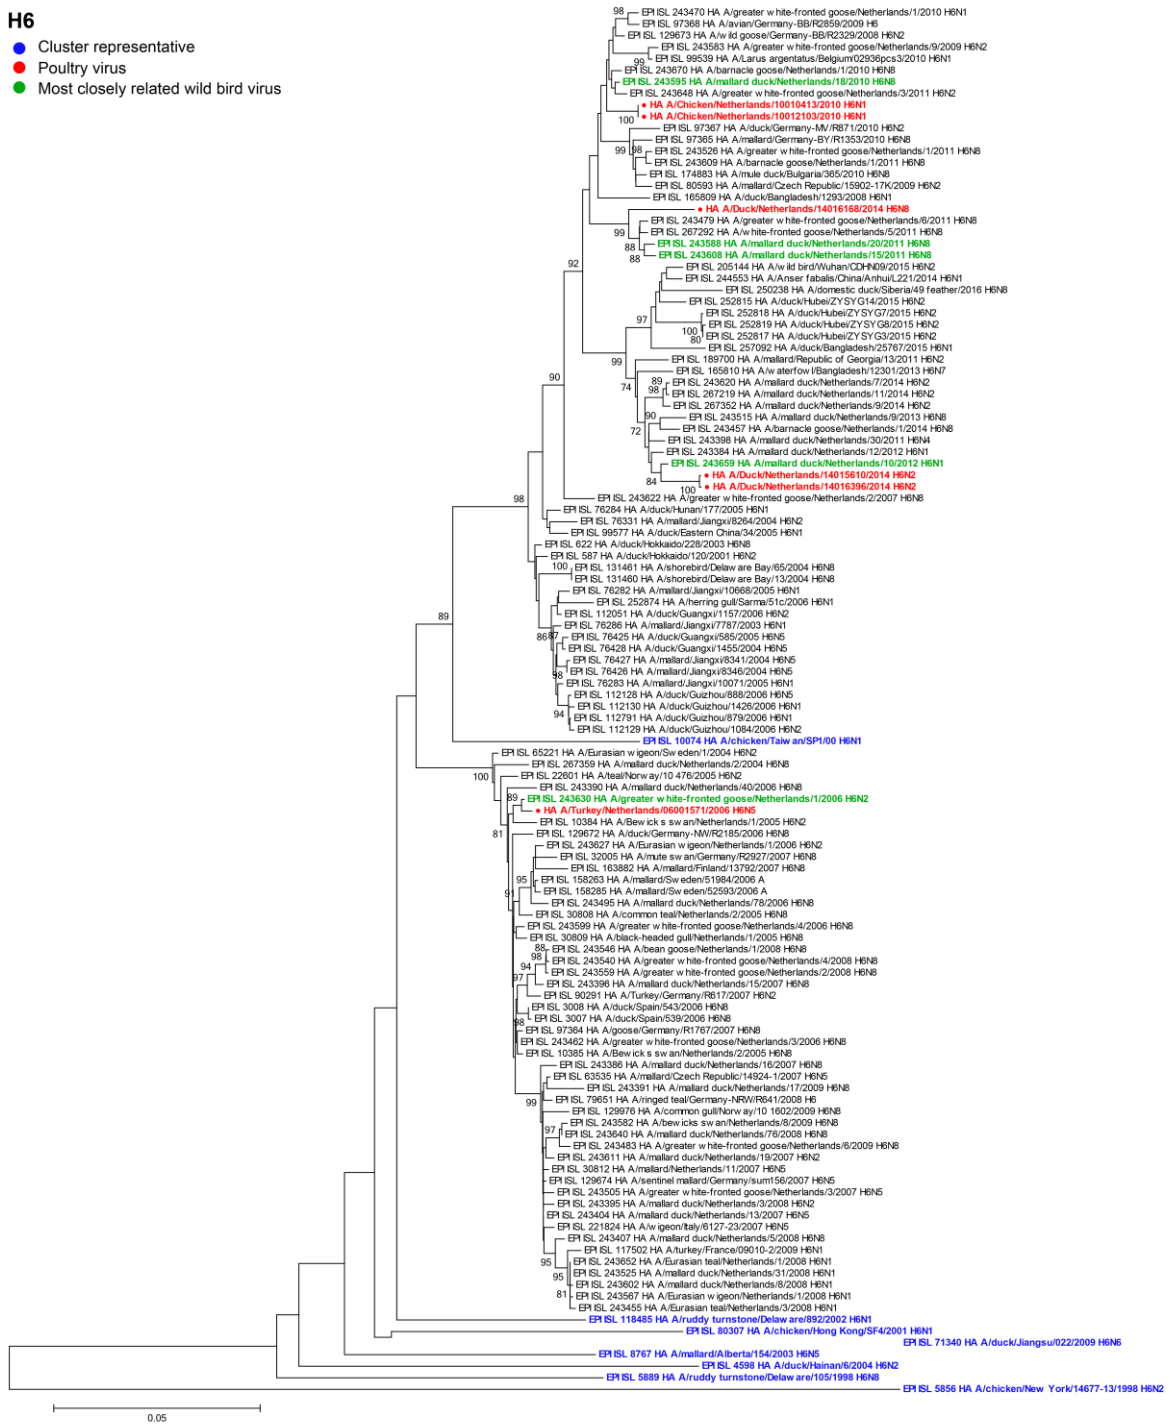

H7

- Cluster representative
- Poultry virus
- Most closely related wild bird virus

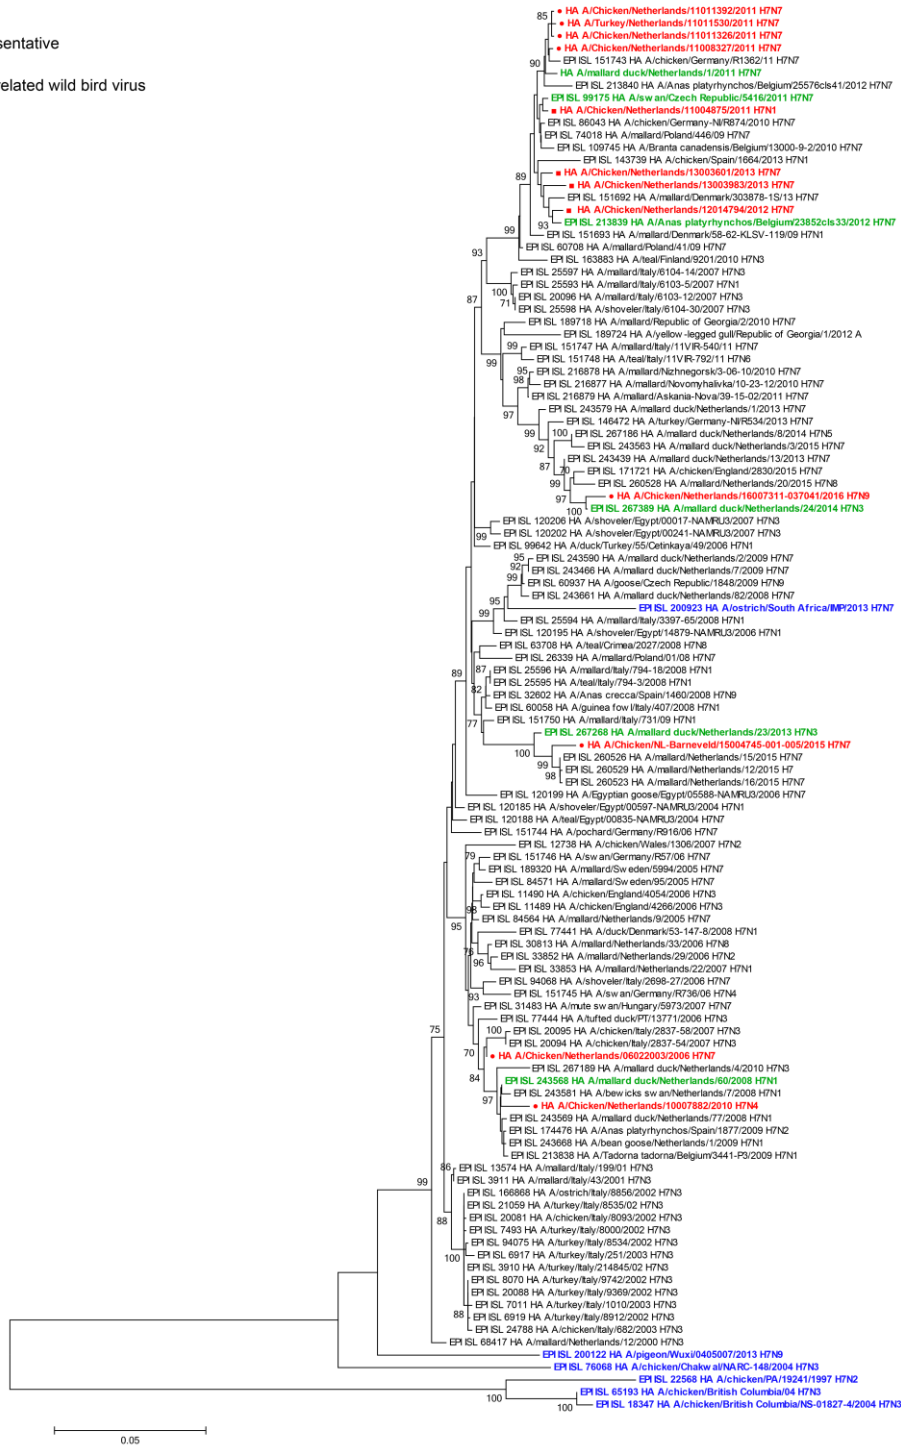

# H8

- Cluster representative
- Poultry virus
- Most closely related wild bird virus

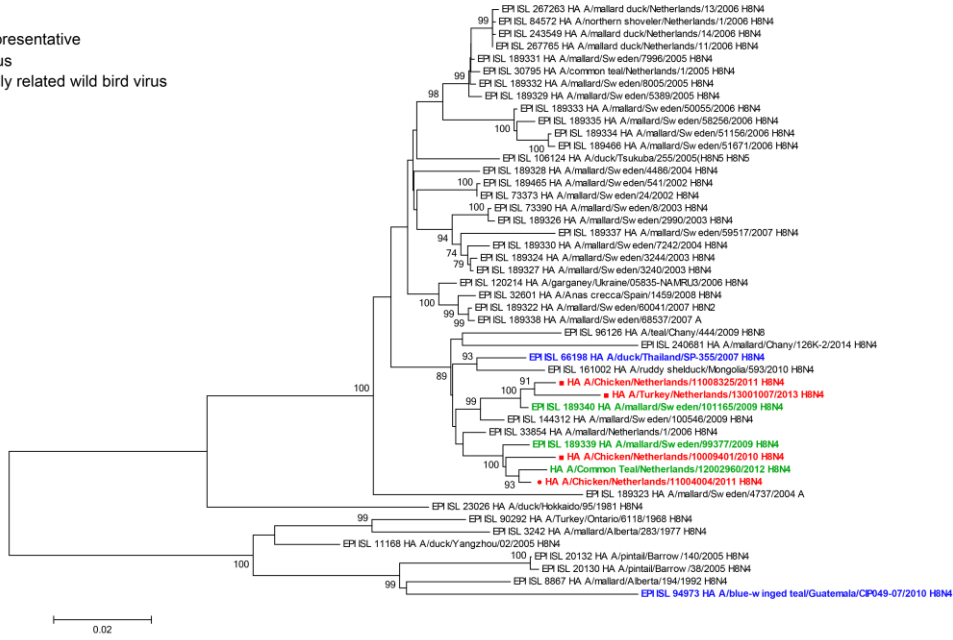

# H9

- Cluster representative
- Poultry virus
- Most closely related wild bird virus

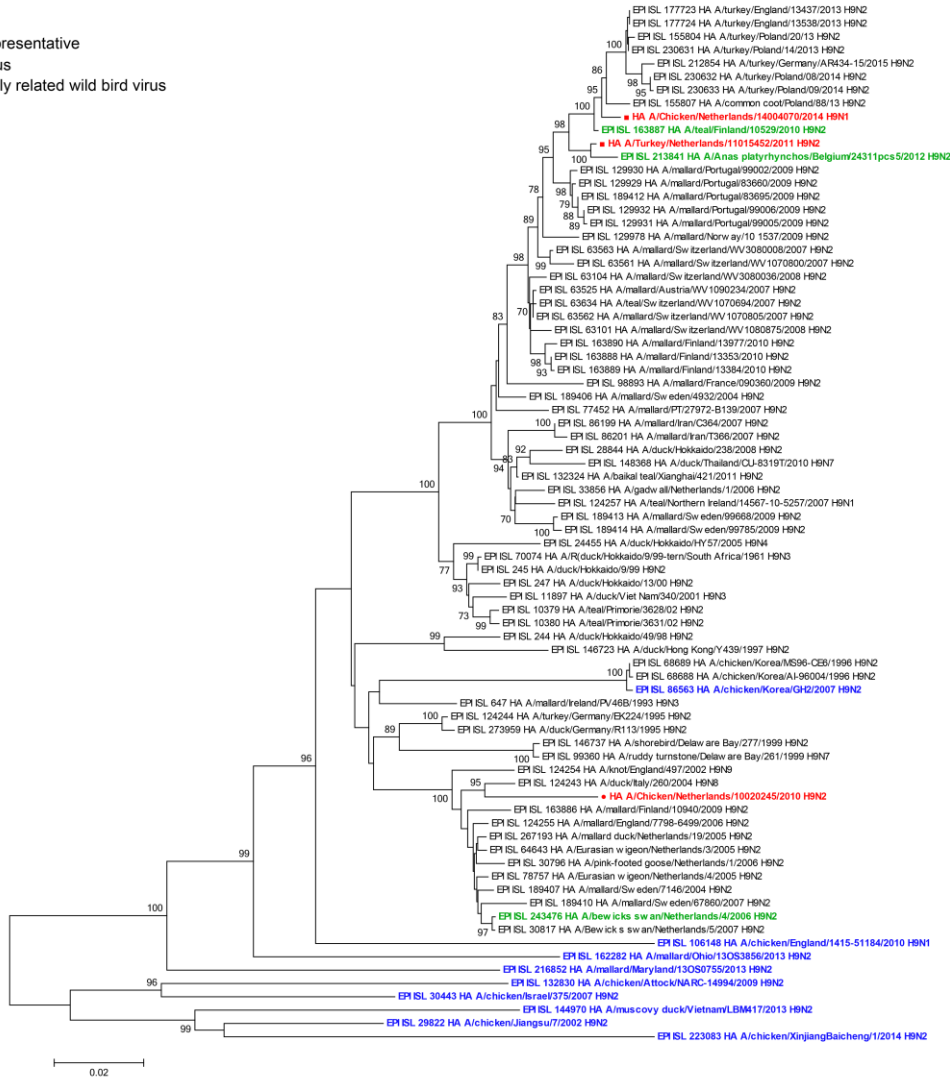

# H10

- Cluster representative
- Poultry virus
- Most closely related wild bird virus

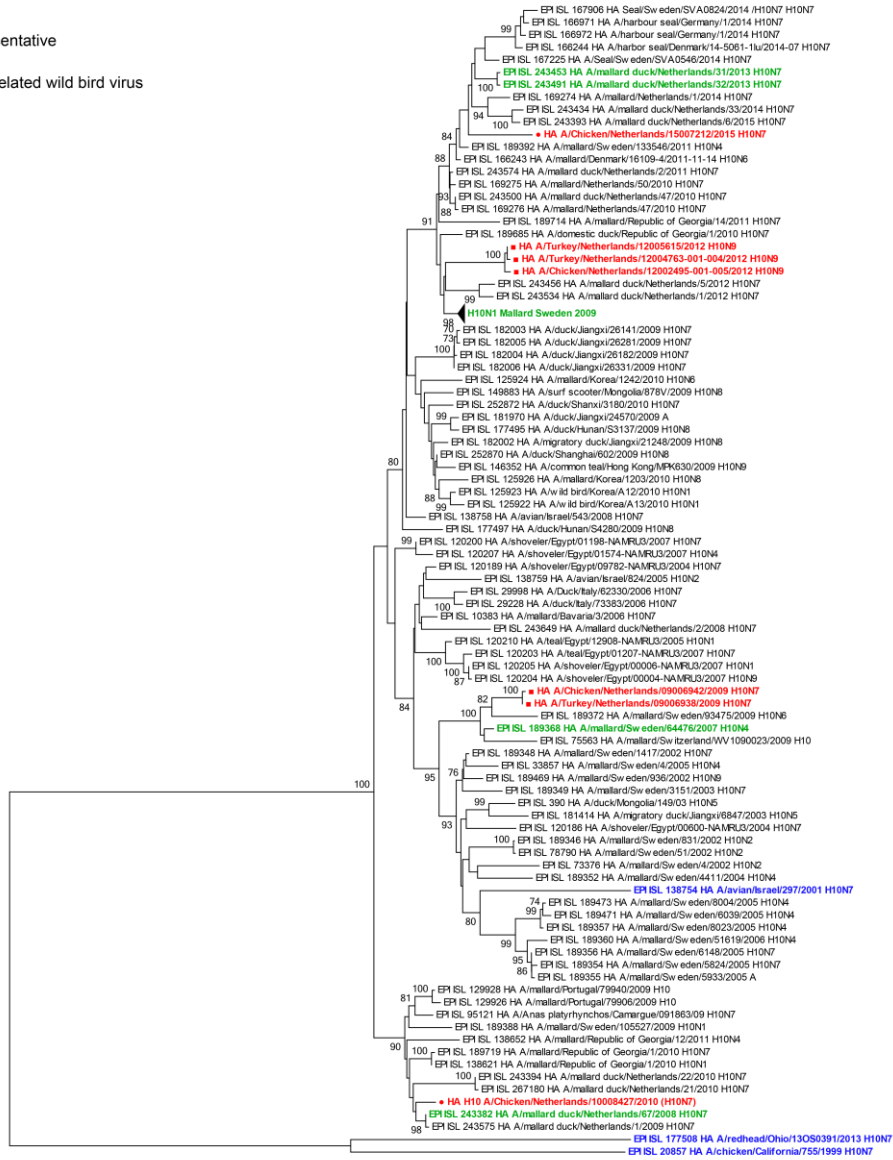

### **Supplementary Figure S2. Phylogenetic trees of NA genes.**

Neighbour joining (NJ) phylogenetic trees of the neuraminidase (NA) gene segments of low pathogenic avian influenza (LPAI) viruses from poultry, detected as part of the national avian influenza (AI) surveillance program in the Netherlands, January 2006-September 2016. Nucleotide (nt) sequences of cluster representatives, poultry viruses and top 50 BLAST hits were aligned for each NA gene segment separately: N1 (1221 nt), N2 (1245 nt), N3 (1343 nt), N4 (1337 nt), N5 (1232 nt), N7 (1225 nt), N8 (1376 nt) and N9 (1342 nt). Phylogenetic trees were generated using the Tamura-Nei substitution model with a gamma distribution (shape parameter = 1) for rate variation within the MEGA7 software package. Bootstrap support values above 70 (1,000 replicates) are shown at the branches. Colours represent cluster representatives (blue), poultry viruses (red), and most identical wild bird viruses as determined by BLAST (red). Symbols represent poultry viruses most identical to wild bird viruses isolated in the Netherlands (dots), other European countries (squares) and Asia (triangles). We gratefully acknowledge the authors, originating and submitting laboratories of the sequences from GISAID's EpiFlu database <sup>28</sup> on which this research is based. All submitters of data may be contacted directly via the GISAID website (<http://www.gisaid.org>).



N1

- Cluster representative
- Poultry virus
- Most closely related wild bird virus

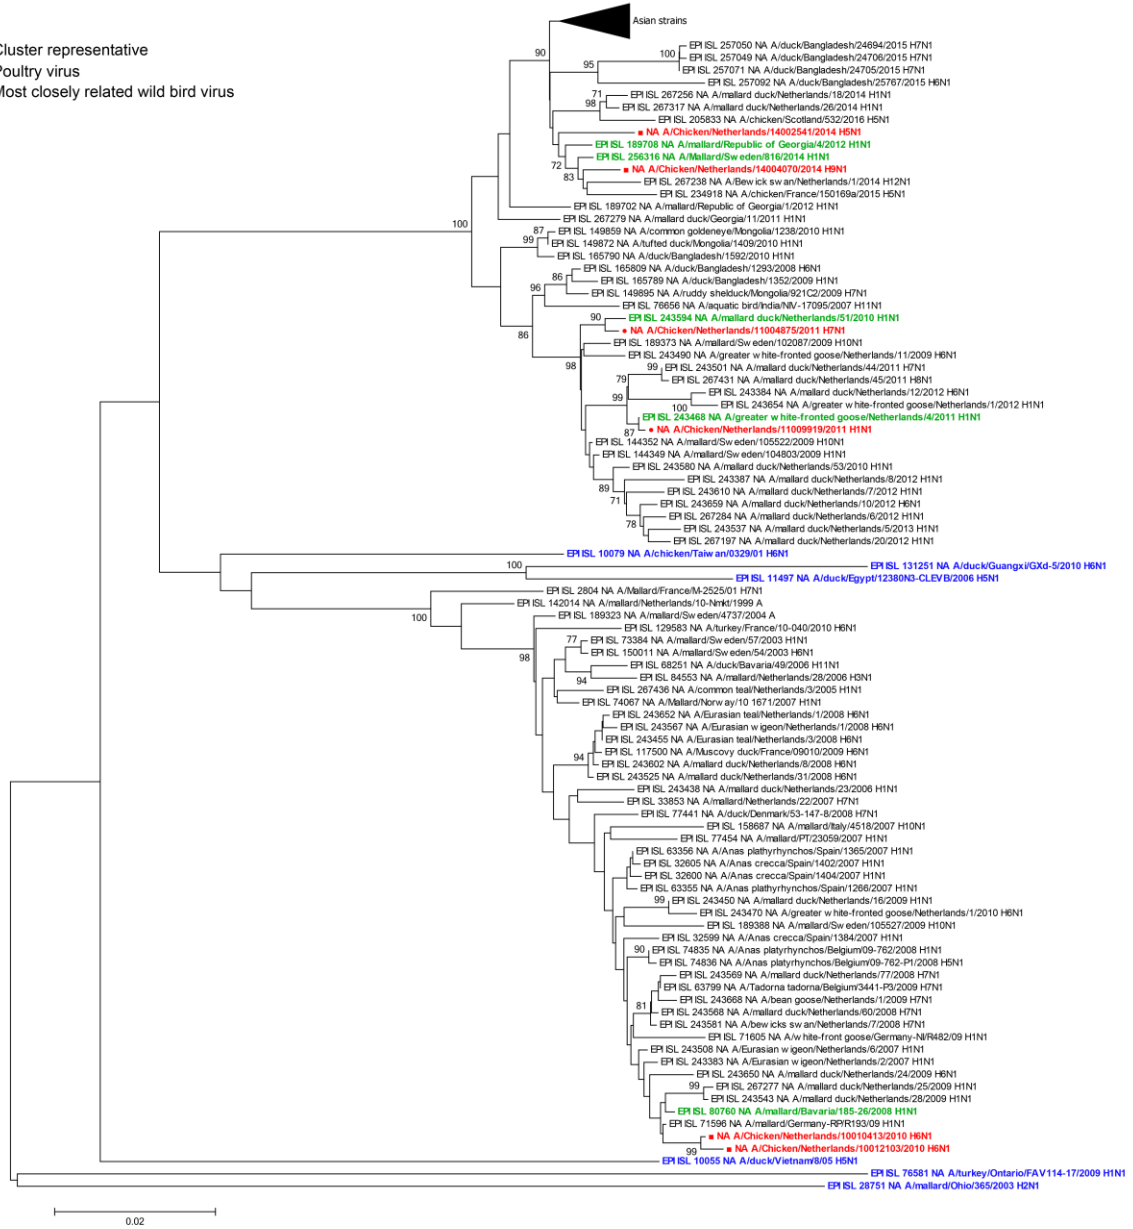



N2

- Cluster representative
- Poultry virus
- Most closely related wild bird virus

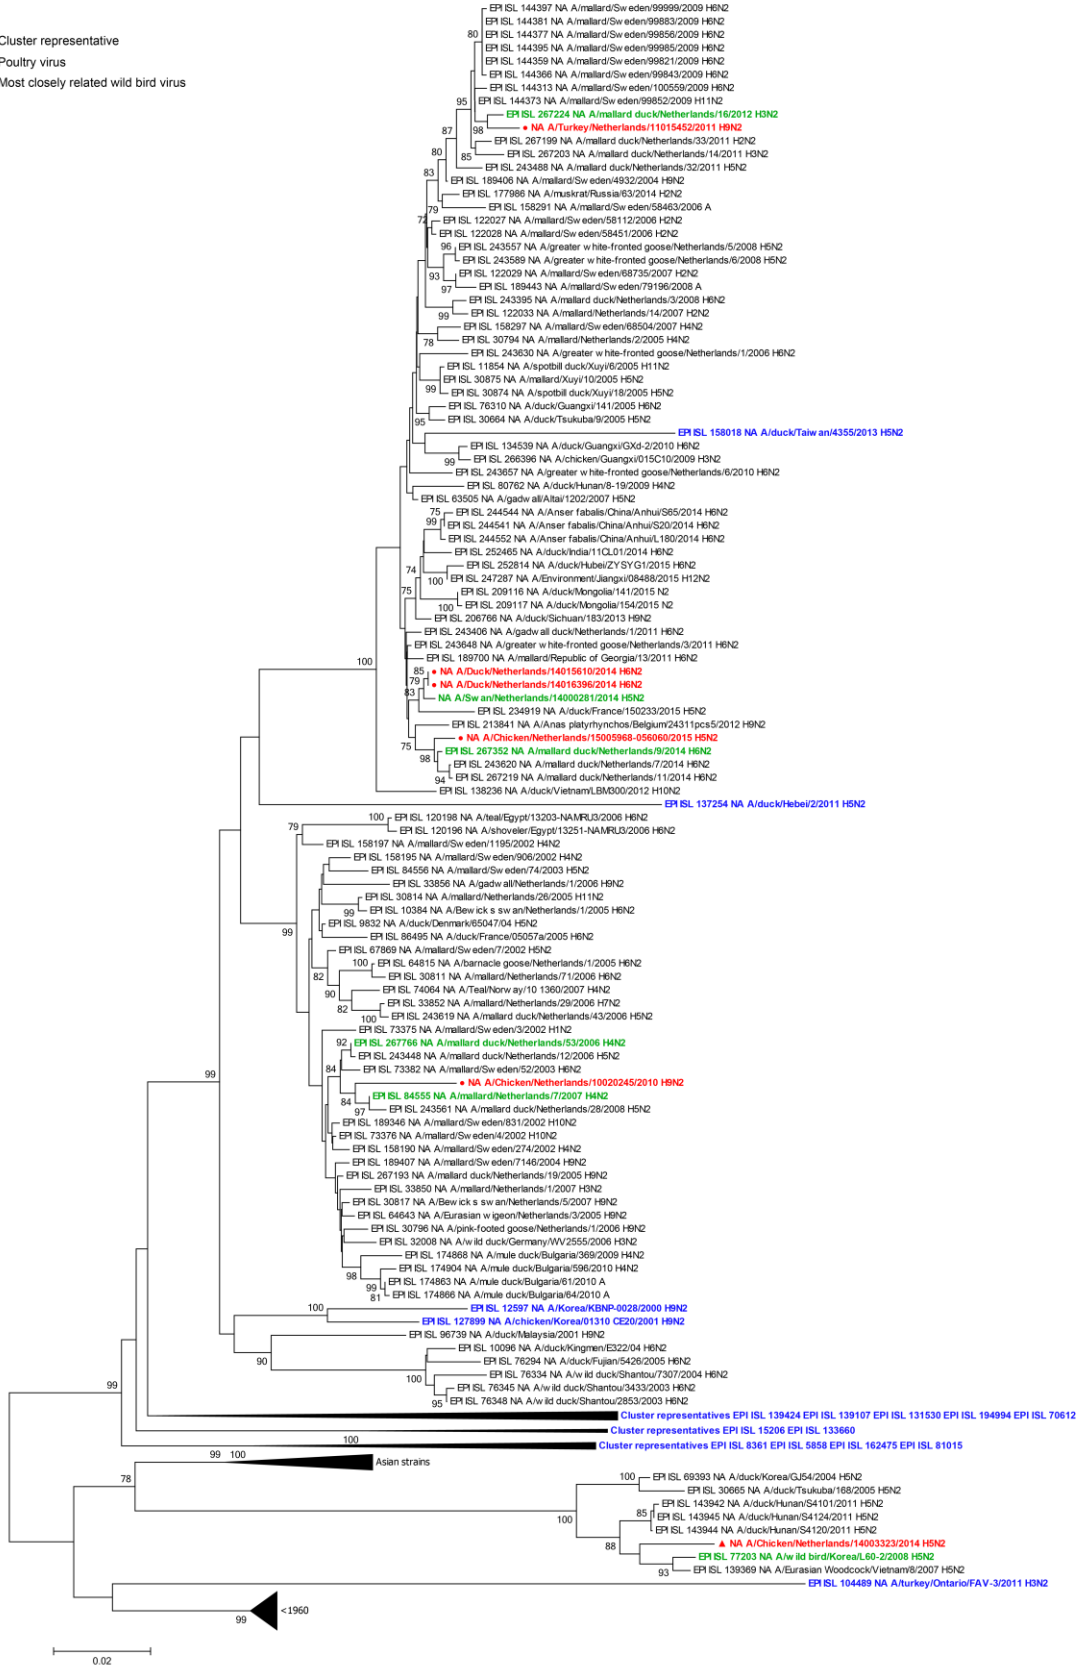

### N3

- Cluster representative
- Poultry virus
- Most closely related wild bird virus

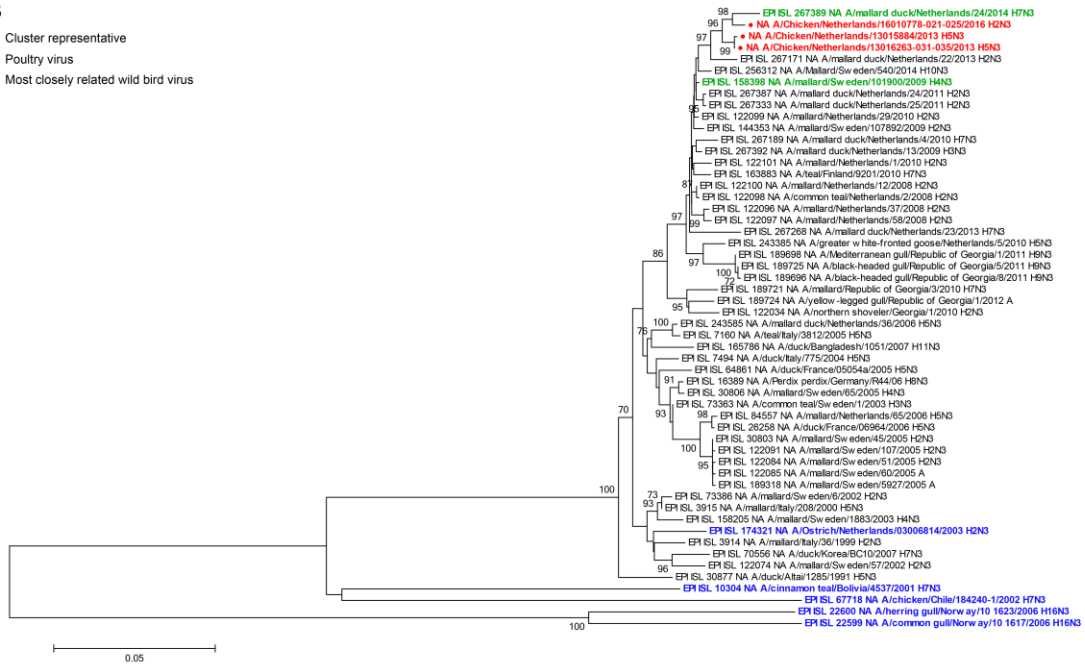

### N4

- Cluster representative
- Poultry virus
- Most closely related wild bird virus

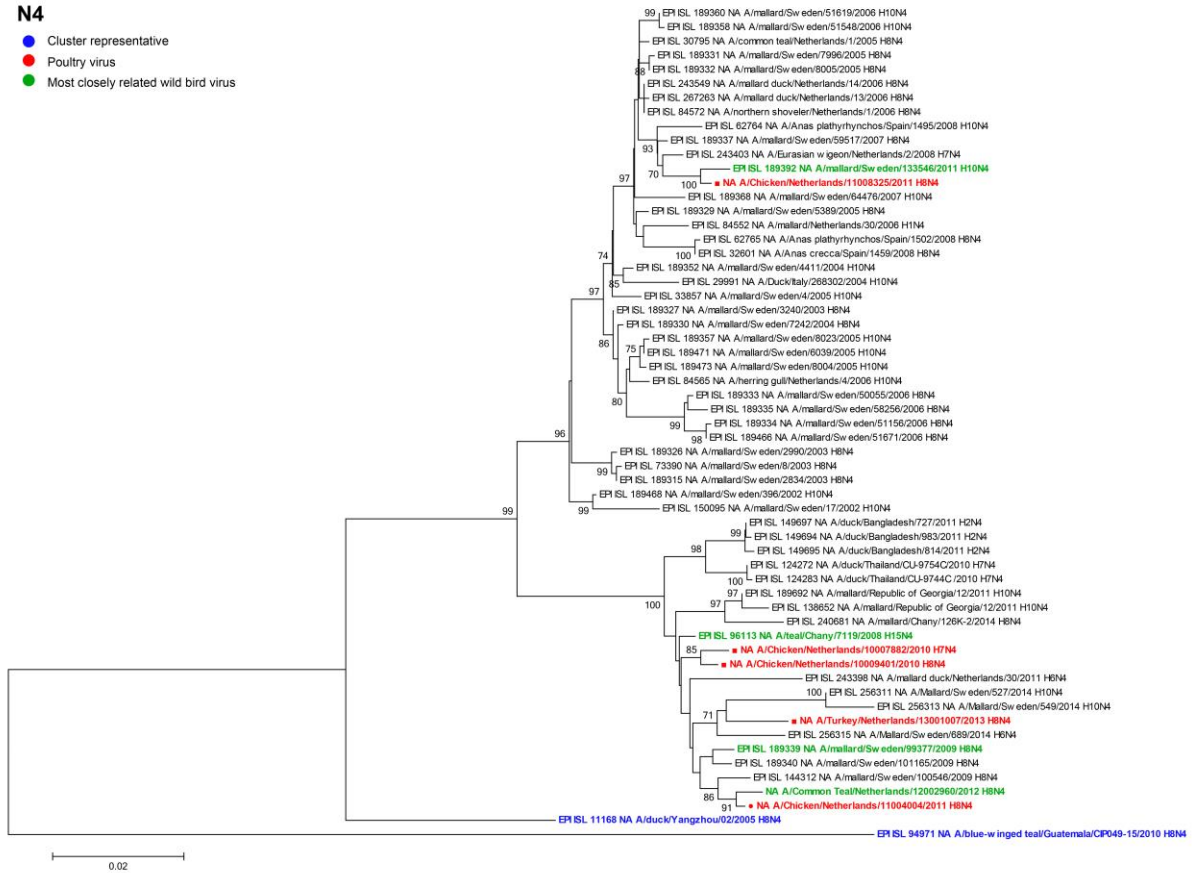

# N5

- Cluster representative
- Poultry virus
- Most closely related wild bird virus

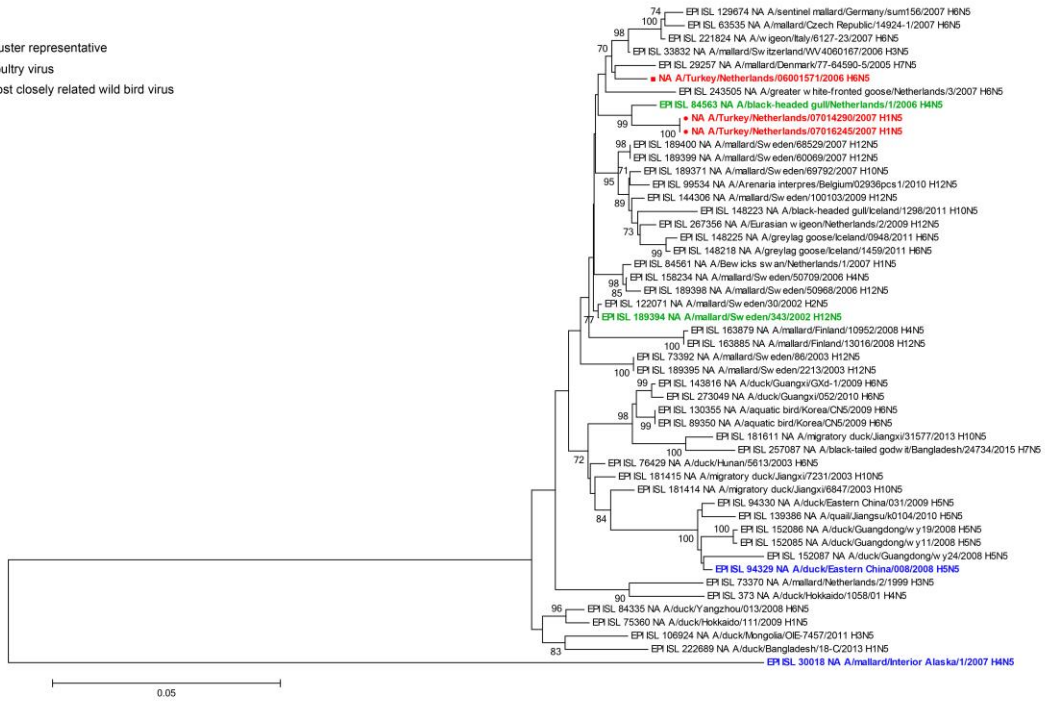



N8

- Cluster representative
- Poultry virus
- Most closely related wild bird virus

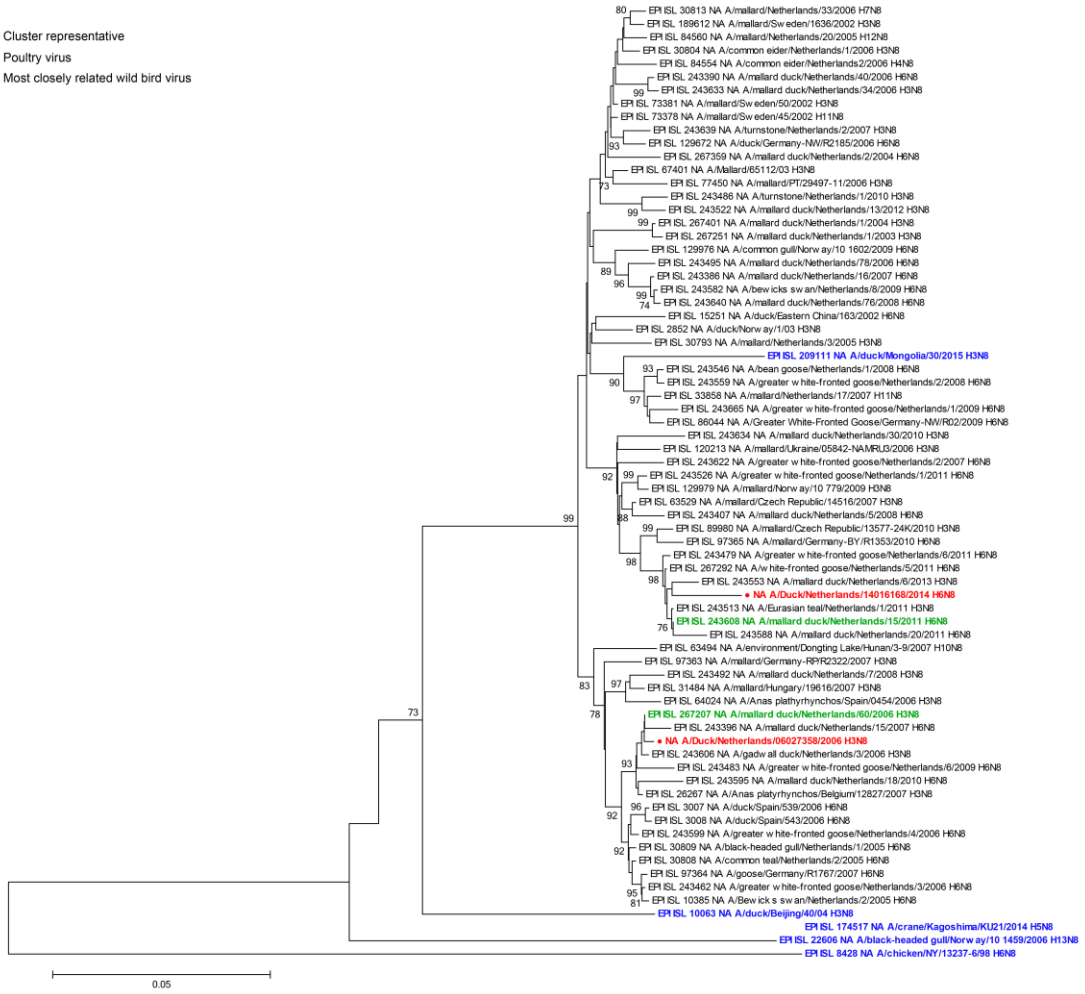

N9

- Cluster representative
- Poultry virus
- Most closely related wild bird virus

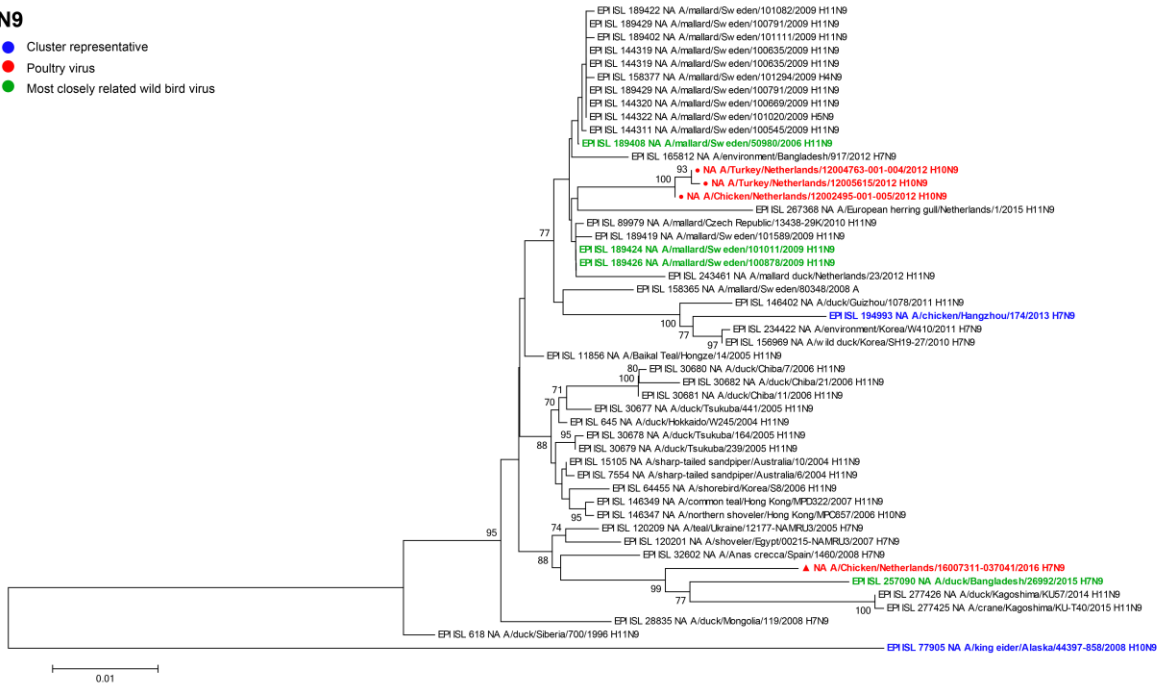

Supplement: 41598_2019_50170_MOESM1_ESM.pdf [file 41598_2019_50170_MOESM1_ESM.pdf]
